# Supplementary material for: Suppression Method of Jump Points for Multipole Magnetic Encoder at Low Temperature Based on Single-Pole Angle Value Fitting
Source: Hindawi journal article supplement (doi:10.1155/2019/7893462), 2019-03-19
Supplement: f1 [file 7893462.f1.txt]

62961	65535	46716	13639
62971	65535	46697	13636
62966	65535	46648	13634
62966	65535	46588	13631
62942	65535	46534	13626
62942	65535	46507	13622
62937	65535	46446	13621
62971	65535	46400	13616
62937	65535	46368	13613
62937	65535	46300	13610
62933	65535	46238	13605
62918	65535	46223	13601
62918	65535	46178	13600
62918	65535	46126	13596
62918	65535	46057	13593
62918	65535	46028	13587
62909	65535	45983	13585
62923	65535	45940	13582
62933	65535	45887	13579
62918	65535	45834	13575
62899	65535	45787	13571
62866	65535	45749	13567
62909	65535	45718	13564
62918	65535	45666	13562
62895	65535	45625	13558
62890	65535	45575	13555
62866	65535	45540	13551
62890	65535	45500	13549
62890	65535	45460	13546
62866	65535	45416	13542
62895	65535	45385	13539
62871	65535	45345	13537
62842	65535	45283	13534
62847	65535	45279	13529
62856	65535	45236	13528
62866	65535	45200	13525
62847	65535	45184	13522
62847	65535	45129	13521
62847	65535	45130	13517
62866	65535	45094	13517
62856	65535	45059	13514
62836	65535	45024	13511
62866	65535	44978	13509
62842	65535	44951	13505
62836	65535	44918	13503
62866	65535	44900	13501
62847	65535	44876	13499
62866	65535	44838	13497
62836	65535	44817	13494
62836	65535	44790	13493
62817	65535	44771	13490
62836	65535	44722	13489
62812	65535	44690	13485
62836	65535	44682	13483
62807	65535	44640	13482
62807	65535	44631	13479
62817	65535	44590	13478
62812	65535	44574	13475
62798	65535	44536	13473
62798	65535	44531	13470
62812	65535	44482	13470
62812	65535	44477	13466
62798	65535	44465	13465
62812	65535	44420	13465
62812	65535	44412	13461
62802	65535	44392	13460
62807	65535	44369	13459
62798	65535	44331	13457
62788	65535	44315	13454
62788	65535	44300	13452
62807	65535	44273	13451
62788	65535	44246	13449
62783	65535	44219	13447
62788	65535	44200	13445
62778	65535	44193	13443
62808	65535	44166	13442
62788	65535	44135	13440
62764	65535	44105	13438
62758	65535	44097	13435
62774	65535	44070	13435
62769	65535	44055	13432
62769	65535	44016	13431
62764	65535	43988	13428
62783	65535	43994	13426
62745	65535	43975	13426
62739	65535	43971	13425
62764	65535	43896	13424
62764	65535	43910	13418
62758	65535	43898	13419
62764	65535	43850	13418
62739	65535	43872	13414
62758	65535	43804	13416
62758	65535	43822	13411
62758	65535	43810	13412
62758	65535	43776	13411
62750	65535	43772	13408
62745	65535	43757	13408
62764	65535	43745	13407
62758	65535	43719	13406
62764	65535	43673	13404
62745	65535	43695	13400
62764	65535	43696	13402
62745	65535	43666	13402
62715	65535	43619	13399
62734	65535	43635	13395
62715	65535	43626	13397
62696	65535	43620	13396
62739	65535	43604	13396
62734	65535	43592	13394
62739	65535	43573	13393
62720	65535	43575	13392
62734	65535	43567	13392
62739	65535	43516	13391
62739	65535	43528	13387
62720	65535	43521	13388
62739	65535	43518	13387
62739	65535	43502	13387
62739	65535	43490	13386
62690	65535	43478	13385
62753	65535	43426	13384
62734	65535	43423	13380
62720	65535	43412	13379
62739	65535	43428	13378
62715	65535	43421	13380
62715	65535	43423	13379
62739	65535	43402	13379
62709	65535	43395	13378
62715	65535	43386	13377
62738	65535	43364	13376
62696	65535	43368	13374
62725	65535	43335	13375
62712	65535	43323	13372
62720	65535	43323	13371
62755	65535	43300	13371
62704	65535	43295	13369
62731	65535	43276	13369
62709	65535	43276	13367
62720	65535	43269	13367
62731	65535	43243	13366
62712	65535	43243	13364
62690	65535	43240	13364
62685	65535	43238	13364
62690	65535	43229	13364
62709	65535	43178	13363
62715	65535	43196	13359
62690	65535	43200	13360
62709	65535	43187	13361
62690	65535	43177	13360
62690	65535	43128	13359
62690	65535	43153	13355
62709	65535	43144	13357
62729	65535	43106	13356
62704	65535	43106	13353
62704	65535	43120	13353
62666	65535	43075	13354
62666	65535	43106	13350
62666	65535	43101	13353
62690	65535	43059	13352
62685	65535	43054	13349
62685	65535	43040	13348
62671	65535	43021	13347
62690	65535	43063	13346
62709	65535	43049	13349
62685	65535	43059	13348
62715	65535	43007	13349
62709	65535	43014	13345
62704	65535	43035	13345
62685	65535	42995	13347
62709	65535	43021	13344
62709	65535	43011	13346
62685	65535	43026	13345
62685	65535	42983	13346
62685	65535	43002	13343
62671	65535	42999	13344
62666	65535	43004	13344
62685	65535	42997	13344
62655	65535	43009	13344
62709	65535	42974	13345
62696	65535	42969	13342
62660	65535	43002	13341
62679	65535	43011	13344
62671	65535	42964	13345
62685	65535	42928	13341
62679	65535	42971	13338
62671	65535	42931	13342
62655	65535	42940	13338
62685	65535	42950	13339
62660	65535	42950	13340
62655	65535	42943	13340
62671	65535	42938	13339
62685	65535	42929	13339
62690	65535	42933	13338
62685	65535	42893	13338
62704	65535	42922	13335
62685	65535	42915	13337
62660	65535	42900	13337
62660	65535	42888	13336
62666	65535	42881	13335
62690	65535	42884	13334
62660	65535	42879	13334
62666	65535	42889	13334
62685	65535	42872	13335
62666	65535	42862	13333
62660	65535	42848	13332
62655	65535	42860	13331
62641	65535	42841	13332
62622	65535	42844	13331
62660	65535	42832	13331
62666	65535	42841	13330
62660	65535	42818	13331
62679	65535	42818	13329
62641	65535	42803	13329
62666	65535	42803	13327
62666	65535	42781	13327
62690	65535	42823	13326
62685	65535	42784	13329
62685	65535	42779	13326
62660	65535	42765	13325
62666	65535	42772	13324
62666	65535	42780	13325
62660	65535	42799	13326
62666	65535	42782	13327
62666	65535	42770	13326
62679	65535	42773	13325
62679	65535	42746	13325
62685	65535	42739	13323
62660	65535	42756	13322
62660	65535	42761	13323
62671	65535	42729	13324
62630	65535	42784	13321
62698	65535	42731	13326
62655	65535	42737	13321
62660	65535	42718	13322
62666	65535	42708	13320
62660	65535	42718	13319
62666	65535	42742	13320
62660	65535	42737	13322
62641	65535	42737	13322
62660	65535	42719	13322
62685	65535	42719	13320
62660	65535	42711	13320
62679	65535	42689	13320
62660	65535	42694	13318
62666	65535	42712	13318
62660	65535	42705	13320
62666	65535	42684	13319
62655	65535	42670	13317
62649	65535	42670	13316
62655	65535	42670	13316
62679	65535	42670	13316
62655	65535	42670	13316
62660	65535	42651	13316
62641	65535	42653	13315
62676	65535	42662	13315
62685	65535	42650	13315
62655	65535	42662	13314
62655	65535	42674	13315
62636	65535	42657	13317
62636	65535	42657	13315
62674	65535	42641	13315
62666	65535	42629	13314
62636	65535	42647	13313
62641	65535	42629	13314
62660	65535	42627	13313
62630	65535	42615	13313
62655	65535	42615	13311
62652	65535	42596	13311
62641	65535	42654	13310
62660	65535	42610	13315
62636	65535	42610	13311
62630	65535	42596	13311
62676	65535	42584	13310
62630	65535	42589	13309
62655	65535	42584	13309
62660	65535	42561	13309
62649	65535	42601	13307
62660	65535	42600	13310
62649	65535	42596	13310
62636	65535	42584	13310
62646	65535	42565	13309
62700	65535	42577	13307
62660	65535	42572	13308
62655	65535	42547	13308
62641	65535	42572	13306
62641	65535	42572	13308
62641	65535	42567	13308
62641	65535	42530	13307
62660	65535	42549	13304
62616	65535	42570	13306
62660	65535	42567	13308
62616	65535	42554	13307
62646	65535	42540	13306
62641	65535	42535	13305
62671	65535	42516	13305
62636	65535	42520	13303
62646	65535	42518	13303
62655	65535	42528	13303
62636	65535	42501	13304
62630	65535	42477	13302
62622	65535	42506	13300
62644	65535	42506	13302
62641	65535	42453	13302
62630	65535	42487	13298
62611	65535	42458	13301
62671	65535	42470	13298
62657	65535	42455	13299
62666	65535	42451	13298
62636	65535	42463	13298
62655	65535	42455	13299
62655	65535	42414	13298
62636	65535	42445	13295
62646	65535	42426	13297
62630	65535	42402	13296
62689	65535	42409	13293
62630	65535	42390	13294
62649	65535	42412	13292
62636	65535	42397	13294
62652	65535	42389	13293
62630	65535	42383	13292
62611	65535	42389	13292
62572	65535	42389	13292
62630	65535	42335	13292
62630	65535	42340	13288
62611	65535	42349	13288
62605	65535	42370	13289
62652	65535	42341	13291
62641	65535	42346	13288
62616	65535	42341	13289
62630	65535	42336	13288
62657	65535	42300	13288
62676	65535	42325	13285
62592	65535	42298	13287
62630	65535	42304	13285
62611	65535	42305	13285
62611	65535	42276	13285
62636	65535	42280	13283
62611	65535	42280	13283
62636	65535	42274	13283
62611	65535	42274	13283
62605	65535	42285	13283
62711	65535	42251	13284
62630	65535	42251	13281
62649	65535	42245	13281
62630	65535	42209	13280
62616	65535	42212	13277
62630	65535	42200	13277
62630	65535	42178	13276
62655	65535	42171	13274
62636	65535	42208	13274
62641	65535	42213	13277
62630	65535	42176	13277
62636	65535	42163	13274
62611	65535	42176	13273
62605	65535	42119	13274
62611	65535	42160	13269
62611	65535	42171	13273
62611	65535	42134	13274
62611	65535	42147	13271
62630	65535	42142	13272
62611	65535	42110	13271
62592	65535	42134	13268
62600	65535	42123	13271
62625	65535	42116	13270
62600	65535	42104	13269
62580	65535	42123	13268
62616	65535	42086	13270
62627	65535	42075	13266
62592	65535	42094	13266
62605	65535	42075	13267
62605	65535	42102	13266
62592	65535	42051	13268
62605	65535	42008	13264
62630	65535	41985	13260
62625	65535	41985	13258
62592	65535	42043	13258
62592	65535	42014	13263
62592	65535	42019	13260
62580	65535	41987	13261
62600	65535	41975	13258
62605	65535	41985	13257
62605	65535	41996	13258
62580	65535	41955	13259
62678	65535	41949	13255
62597	65535	41954	13255
62586	65535	41953	13255
62605	65535	41942	13255
62605	65535	41925	13254
62605	65535	41923	13253
62555	65535	41889	13253
62580	65535	41894	13250
62605	65535	41892	13250
62627	65535	41882	13250
62611	65535	41863	13249
62567	65535	41877	13248
62597	65535	41865	13249
62594	65535	41863	13248
62580	65535	41857	13248
62605	65535	41828	13247
62586	65535	41815	13245
62575	65535	41816	13244
62561	65535	41809	13244
62600	65535	41724	13243
62586	65535	41724	13236
62586	65535	41724	13236
62567	65535	41762	13236
62580	65535	41750	13239
62561	65535	41738	13238
62575	65535	41737	13237
62575	65535	41731	13237
62536	65535	41724	13236
62575	65535	41634	13236
62561	65535	41678	13228
62580	65535	41671	13232
62567	65535	41665	13231
62575	65535	41590	13231
62555	65535	41664	13225
62567	65535	41629	13231
62555	65535	41634	13228
62580	65535	41555	13228
62555	65535	41605	13222
62580	65535	41604	13226
62542	65535	41580	13226
62555	65535	41574	13224
62555	65535	41557	13223
62542	65535	41488	13222
62575	65535	41533	13216
62530	65535	41469	13220
62550	65535	41463	13214
62555	65535	41497	13214
62555	65535	41502	13217
62536	65535	41472	13217
62536	65535	41478	13215
62555	65535	41409	13215
62542	65535	41385	13209
62547	65535	41431	13207
62555	65535	41448	13211
62536	65535	41354	13213
62525	65535	41406	13205
62550	65535	41388	13209
62530	65535	41376	13208
62542	65535	41318	13207
62536	65535	41299	13202
62530	65535	41358	13200
62530	65535	41334	13205
62530	65535	41334	13203
62550	65535	41310	13203
62550	65535	41251	13201
62550	65535	41309	13196
62550	65535	41262	13201
62530	65535	41279	13197
62536	65535	41262	13198
62511	65535	41250	13197
62555	65535	41249	13196
62536	65535	41172	13196
62530	65535	41219	13189
62530	65535	41207	13193
62505	65535	41201	13192
62499	65535	41177	13192
62505	65535	41171	13190
62519	65535	41177	13189
62530	65535	41159	13190
62505	65535	41153	13188
62511	65535	41087	13188
62511	65535	41069	13182
62550	65535	41111	13180
62511	65535	41110	13184
62486	65535	41033	13184
62499	65535	41033	13177
62505	65535	41092	13177
62525	65535	41062	13182
62505	65535	41062	13180
62525	65535	41050	13180
62511	65535	40984	13179
62519	65535	40966	13173
62505	65535	41032	13172
62511	65535	41020	13177
62530	65535	41020	13176
62505	65535	40996	13176
62505	65535	40978	13174
62474	65535	40972	13173
62511	65535	40960	13172
62499	65535	40960	13171
62499	65535	40929	13171
62505	65535	40874	13168
62480	65535	40911	13164
62499	65535	40917	13167
62587	65535	40887	13167
62505	65535	40881	13165
62505	65535	40875	13164
62499	65535	40862	13164
62505	65535	40863	13163
62486	65535	40857	13163
62598	65535	40839	13162
62480	65535	40832	13161
62488	65535	40784	13160
62480	65535	40826	13156
62488	65535	40802	13160
62522	65535	40784	13158
62449	65535	40778	13156
62519	65535	40766	13156
62474	65535	40741	13155
62480	65535	40735	13152
62461	65535	40723	13152
62480	65535	40711	13151
62494	65535	40717	13150
62480	65535	40692	13150
62486	65535	40705	13148
62486	65535	40699	13149
62480	65535	40662	13149
62484	65535	40650	13146
62462	65535	40557	13145
62474	65535	40638	13137
62497	65535	40614	13144
62474	65535	40626	13142
62468	65535	40607	13143
62461	65535	40606	13141
62435	65535	40594	13141
62449	65535	40495	13140
62449	65535	40552	13131
62443	65535	40540	13136
62449	65535	40546	13135
62497	65535	40528	13136
62492	65535	40545	13134
62430	65535	40598	13136
62468	65535	40509	13140
62449	65535	40485	13133
62468	65535	40491	13131
62424	65535	40486	13131
62455	65535	40467	13131
62449	65535	40467	13129
62449	65535	40461	13129
62455	65535	40455	13129
62441	65535	40437	13128
62455	65535	40417	13127
62461	65535	40417	13125
62449	65535	40418	13125
62455	65535	40400	13125
62430	65535	40400	13123
62468	65535	40394	13123
62449	65535	40368	13123
62441	65535	40387	13121
62461	65535	40382	13122
62443	65535	40375	13122
62447	65535	40351	13121
62437	65535	40350	13119
62443	65535	40326	13119
62437	65535	40337	13117
62455	65535	40332	13118
62449	65535	40332	13118
62430	65535	40307	13118
62424	65535	40289	13116
62410	65535	40289	13114
62410	65535	40282	13114
62430	65535	40283	13114
62449	65535	40277	13114
62449	65535	40264	13113
62449	65535	40271	13112
62449	65535	40271	13113
62430	65535	40251	13113
62455	65535	40258	13111
62443	65535	40277	13112
62435	65535	40264	13113
62449	65535	40167	13112
62455	65535	40221	13104
62430	65535	40234	13108
62430	65535	40155	13110
62430	65535	40234	13103
62437	65535	40221	13110
62424	65535	40215	13108
62449	65535	40195	13108
62424	65535	40130	13106
62430	65535	40197	13101
62430	65535	40203	13106
62430	65535	40197	13107
62430	65535	40171	13106
62435	65535	40183	13104
62449	65535	40177	13105
62430	65535	40172	13105
62430	65535	40172	13104
62430	65535	40152	13104
62430	65535	40086	13103
62430	65535	40086	13097
62435	65535	40159	13097
62410	65535	40148	13103
62449	65535	40062	13102
62430	65535	40140	13095
62449	65535	40068	13102
62424	65535	40135	13096
62424	65535	40109	13101
62418	65535	40134	13099
62391	65535	40115	13101
62410	65535	40109	13100
62410	65535	40048	13099
62437	65535	40090	13094
62410	65535	40043	13097
62435	65535	40117	13094
62410	65535	40029	13100
62430	65535	40029	13092
62404	65535	40090	13092
62443	65535	40097	13097
62424	65535	40098	13098
62418	65535	40090	13098
62424	65535	40091	13097
62443	65535	40091	13098
62424	65535	40086	13098
62404	65535	40091	13097
62424	65535	40073	13098
62424	65535	40080	13096
62404	65535	40059	13097
62404	65535	40066	13095
62404	65535	39994	13095
62404	65535	39999	13089
62430	65535	40073	13090
62398	65535	40034	13096
62418	65535	40028	13093
62412	65535	40048	13092
62425	65535	40028	13094
62418	65535	39962	13092
62379	65535	40035	13087
62398	65535	39956	13093
62418	65535	40024	13086
62418	65535	39944	13092
62418	65535	40017	13085
62424	65535	40017	13091
62418	65535	39937	13091
62410	65535	39930	13085
62437	65535	40011	13084
62404	65535	39980	13091
62443	65535	39910	13088
62410	65535	39973	13082
62410	65535	39992	13088
62424	65535	39986	13089
62418	65535	39986	13089
62424	65535	39986	13089
62424	65535	39974	13089
62424	65535	39973	13088
62449	65535	39954	13088
62424	65535	39954	13086
62430	65535	39966	13086
62410	65535	39947	13087
62404	65535	39967	13086
62418	65535	39867	13087
62424	65535	39867	13079
62404	65535	39955	13079
62410	65535	39916	13086
62418	65535	39916	13083
62404	65535	39861	13083
62410	65535	39910	13078
62424	65535	39848	13082
62392	65535	39837	13077
62392	65535	39924	13076
62398	65535	39904	13084
62398	65535	39912	13082
62404	65535	39823	13083
62398	65535	39891	13075
62398	65535	39891	13081
62398	65535	39892	13081
62379	65535	39893	13081
62404	65535	39897	13081
62424	65535	39886	13081
62404	65535	39877	13080
62418	65535	39886	13080
62424	65535	39881	13080
62398	65535	39880	13080
62404	65535	39868	13080
62398	65535	39866	13079
62418	65535	39773	13079
62404	65535	39841	13071
62424	65535	39785	13077
62424	65535	39849	13072
62430	65535	39855	13077
62398	65535	39849	13078
62404	65535	39828	13077
62424	65535	39828	13076
62398	65535	39836	13076
62379	65535	39831	13076
62373	65535	39824	13076
62373	65535	39824	13075
62398	65535	39797	13075
62398	65535	39790	13073
62404	65535	39790	13073
62430	65535	39811	13073
62418	65535	39785	13074
62404	65535	39778	13072
62392	65535	39771	13072
62404	65535	39786	13071
62379	65535	39759	13072
62404	65535	39766	13070
62398	65535	39759	13071
62398	65535	39684	13070
62404	65535	39740	13064
62398	65535	39767	13069
62418	65535	39755	13071
62385	65535	39727	13070
62398	65535	39679	13067
62379	65535	39673	13063
62398	65535	39727	13063
62398	65535	39721	13067
62398	65535	39652	13067
62404	65535	39743	13061
62412	65535	39736	13069
62418	65535	39743	13068
62361	65535	39728	13069
62398	65535	39710	13068
62392	65535	39723	13066
62367	65535	39731	13067
62392	65535	39695	13068
62379	65535	39717	13065
62398	65535	39712	13067
62385	65535	39621	13066
62398	65535	39616	13059
62379	65535	39678	13058
62404	65535	39704	13063
62418	65535	39676	13066
62379	65535	39607	13063
62392	65535	39657	13057
62392	65535	39686	13062
62398	65535	39588	13064
62418	65535	39672	13056
62379	65535	39672	13063
62359	65535	39597	13063
62379	65535	39588	13057
62385	65535	39626	13056
62392	65535	39667	13059
62379	65535	39563	13062
62373	65535	39563	13054
62373	65535	39648	13054
62373	65535	39648	13061
62373	65535	39643	13061
62367	65535	39627	13060
62353	65535	39627	13059
62373	65535	39629	13059
62380	65535	39624	13059
62367	65535	39551	13059
62359	65535	39627	13053
62385	65535	39622	13059
62367	65535	39617	13059
62353	65535	39520	13058
62379	65535	39582	13050
62367	65535	39534	13055
62373	65535	39520	13051
62398	65535	39610	13050
62373	65535	39514	13058
62418	65535	39506	13050
62379	65535	39568	13049
62392	65535	39572	13054
62373	65535	39549	13054
62386	65535	39572	13053
62373	65535	39572	13054
62385	65535	39572	13054
62373	65535	39537	13054
62379	65535	39537	13052
62373	65535	39551	13052
62367	65535	39558	13053
62386	65535	39553	13053
62347	65535	39526	13053
62373	65535	39532	13051
62347	65535	39553	13051
62361	65535	39547	13053
62347	65535	39532	13052
62347	65535	39513	13051
62373	65535	39520	13050
62379	65535	39443	13050
62359	65535	39443	13044
62379	65535	39509	13044
62373	65535	39509	13049
62379	65535	39514	13049
62392	65535	39509	13050
62398	65535	39474	13049
62373	65535	39507	13046
62373	65535	39423	13049
62379	65535	39495	13042
62353	65535	39474	13048
62373	65535	39488	13046
62379	65535	39404	13047
62373	65535	39448	13041
62373	65535	39476	13044
62412	65535	39462	13046
62334	65535	39448	13045
62353	65535	39462	13044
62367	65535	39457	13045
62398	65535	39471	13045
62341	65535	39471	13046
62353	65535	39385	13046
62347	65535	39372	13039
62353	65535	39436	13038
62367	65535	39422	13043
62367	65535	39422	13042
62353	65535	39429	13042
62373	65535	39365	13043
62392	65535	39365	13037
62379	65535	39429	13037
62373	65535	39439	13043
62373	65535	39348	13043
62373	65535	39410	13036
62347	65535	39445	13041
62367	65535	39432	13044
62392	65535	39418	13043
62373	65535	39334	13042
62373	65535	39411	13035
62379	65535	39334	13041
62373	65535	39418	13035
62367	65535	39341	13042
62353	65535	39327	13035
62322	65535	39411	13034
62347	65535	39322	13041
62379	65535	39401	13034
62347	65535	39327	13040
62385	65535	39392	13034
62367	65535	39404	13040
62379	65535	39380	13041
62373	65535	39385	13039
62460	65535	39356	13039
62391	65535	39368	13037
62328	65535	39380	13038
62384	65535	39383	13039
62353	65535	39364	13039
62353	65535	39364	13037
62365	65535	39376	13037
62361	65535	39333	13038
62373	65535	39347	13035
62373	65535	39333	13036
62373	65535	39341	13035
62373	65535	39274	13035
62347	65535	39256	13030
62367	65535	39249	13028
62328	65535	39341	13028
62347	65535	39280	13035
62367	65535	39244	13030
62353	65535	39249	13027
62353	65535	39225	13028
62373	65535	39280	13026
62367	65535	39232	13030
62347	65535	39230	13026
62347	65535	39303	13026
62353	65535	39267	13032
62347	65535	39271	13029
62367	65535	39291	13030
62341	65535	39186	13031
62367	65535	39191	13023
62353	65535	39243	13023
62347	65535	39186	13027
62347	65535	39257	13023
62347	65535	39243	13028
62347	65535	39261	13027
62335	65535	39159	13029
62322	65535	39226	13020
62347	65535	39252	13026
62328	65535	39166	13028
62367	65535	39226	13021
62328	65535	39226	13026
62347	65535	39219	13026
62347	65535	39138	13025
62341	65535	39197	13019
62328	65535	39133	13024
62347	65535	39187	13018
62308	65535	39183	13023
62328	65535	39120	13022
62373	65535	39130	13017
62347	65535	39201	13018
62328	65535	39108	13024
62341	65535	39201	13016
62347	65535	39173	13024
62347	65535	39187	13022
62347	65535	39108	13023
62347	65535	39158	13016
62347	65535	39187	13020
62341	65535	39158	13023
62347	65535	39094	13020
62334	65535	39151	13015
62328	65535	39094	13020
62341	65535	39141	13015
62341	65535	39079	13019
62347	65535	39175	13014
62341	65535	39074	13022
62302	65535	39134	13013
62347	65535	39148	13018
62322	65535	39120	13019
62322	65535	39060	13017
62341	65535	39134	13012
62341	65535	39143	13018
62322	65535	39107	13019
62328	65535	39098	13016
62334	65535	39120	13015
62341	65535	39047	13017
62322	65535	39100	13011
62347	65535	39047	13016
62322	65535	39124	13011
62322	65535	39030	13017
62302	65535	39100	13010
62341	65535	39030	13016
62302	65535	39117	13010
62347	65535	39016	13017
62322	65535	39117	13009
62322	65535	39110	13017
62341	65535	39074	13016
62361	65535	39088	13013
62308	65535	39105	13015
62341	65535	39069	13016
62322	65535	39085	13013
62315	65535	39095	13014
62322	65535	39061	13015
62328	65535	39003	13012
62347	65535	39081	13008
62341	65535	39095	13014
62322	65535	39088	13015
62361	65535	39001	13015
62341	65535	39008	13007
62341	65535	39078	13008
62315	65535	39078	13014
62302	65535	39049	13014
62322	65535	39071	13011
62341	65535	39020	13013
62341	65535	39035	13009
62322	65535	39064	13010
62322	65535	38969	13013
62341	65535	39051	13005
62341	65535	39032	13011
62328	65535	38957	13010
62309	65535	39037	13004
62315	65535	39032	13010
62315	65535	39010	13010
62315	65535	39017	13008
62308	65535	39005	13009
62345	65535	39010	13008
62315	65535	39060	13008
62308	65535	39015	13012
62353	65535	39018	13009
62322	65535	38986	13009
62335	65535	39008	13006
62308	65535	39010	13008
62302	65535	39003	13008
62322	65535	38991	13008
62328	65535	38993	13007
62341	65535	38996	13007
62322	65535	38964	13007
62322	65535	38971	13004
62315	65535	38993	13005
62302	65535	38979	13007
62308	65535	38986	13006
62341	65535	38898	13006
62341	65535	38949	12999
62328	65535	38898	13003
62347	65535	38935	12999
62347	65535	38942	13002
62308	65535	38949	13003
62322	65535	38949	13003
62322	65535	38949	13003
62296	65535	38942	13003
62322	65535	38942	13003
62296	65535	38876	13003
62302	65535	38859	12997
62302	65535	38920	12996
62347	65535	38959	13001
62315	65535	38959	13004
62296	65535	38954	13004
62290	65535	38925	13004
62322	65535	38925	13001
62322	65535	38932	13001
62322	65535	38925	13002
62322	65535	38920	13001
62303	65535	38910	13001
62315	65535	38901	13000
62424	65535	38901	12999
62334	65535	38932	12999
62321	65535	38935	13002
62315	65535	38905	13002
62322	65535	38866	12999
62328	65535	38866	12996
62302	65535	38861	12996
62302	65535	38861	12996
62322	65535	38861	12996
62302	65535	38908	12996
62322	65535	38886	13000
62328	65535	38888	12998
62334	65535	38881	12998
62302	65535	38901	12998
62302	65535	38879	12999
62322	65535	38857	12997
62315	65535	38852	12996
62315	65535	38857	12995
62315	65535	38797	12996
62302	65535	38842	12991
62302	65535	38834	12994
62302	65535	38834	12994
62322	65535	38805	12994
62296	65535	38785	12991
62315	65535	38815	12990
62308	65535	38810	12992
62322	65535	38844	12992
62322	65535	38862	12994
62296	65535	38825	12996
62296	65535	38862	12993
62322	65535	38817	12996
62302	65535	38854	12992
62322	65535	38827	12995
62302	65535	38803	12993
62290	65535	38813	12991
62296	65535	38780	12992
62302	65535	38842	12989
62309	65535	38827	12994
62296	65535	38776	12993
62322	65535	38786	12989
62315	65535	38808	12990
62296	65535	38800	12992
62296	65535	38790	12991
62315	65535	38788	12990
62276	65535	38721	12990
62296	65535	38731	12984
62302	65535	38773	12985
62302	65535	38786	12989
62302	65535	38786	12990
62302	65535	38707	12990
62322	65535	38714	12983
62296	65535	38694	12984
62296	65535	38769	12982
62296	65535	38732	12988
62290	65535	38749	12985
62296	65535	38715	12987
62283	65535	38682	12984
62296	65535	38715	12981
62315	65535	38660	12984
62308	65535	38700	12979
62276	65535	38645	12983
62302	65535	38647	12978
62296	65535	38650	12978
62296	65535	38632	12979
62283	65535	38635	12977
62302	65535	38695	12977
62302	65535	38683	12982
62296	65535	38608	12981
62283	65535	38623	12975
62315	65535	38593	12976
62296	65535	38656	12974
62296	65535	38600	12979
62270	65535	38588	12974
62296	65535	38581	12973
62276	65535	38645	12973
62322	65535	38641	12978
62276	65535	38581	12978
62290	65535	38553	12973
62283	65535	38576	12971
62270	65535	38546	12972
62302	65535	38594	12970
62296	65535	38614	12974
62308	65535	38589	12976
62327	65535	38597	12973
62296	65535	38596	12974
62276	65535	38577	12974
62290	65535	38544	12972
62270	65535	38582	12970
62290	65535	38521	12973
62296	65535	38519	12968
62296	65535	38571	12968
62290	65535	38574	12972
62290	65535	38517	12972
62290	65535	38567	12968
62270	65535	38499	12972
62270	65535	38547	12966
62270	65535	38514	12970
62290	65535	38491	12967
62276	65535	38484	12965
62302	65535	38542	12965
62296	65535	38512	12970
62296	65535	38464	12967
62276	65535	38467	12963
62276	65535	38476	12963
62270	65535	38467	12964
62309	65535	38527	12963
62276	65535	38471	12968
62296	65535	38464	12964
62296	65535	38527	12963
62270	65535	38444	12968
62290	65535	38497	12962
62270	65535	38455	12966
62264	65535	38436	12962
62276	65535	38444	12961
62258	65535	38444	12962
62264	65535	38436	12962
62270	65535	38424	12961
62296	65535	38489	12960
62270	65535	38485	12965
62276	65535	38473	12965
62276	65535	38473	12964
62276	65535	38473	12964
62270	65535	38404	12964
62276	65535	38473	12958
62290	65535	38420	12964
62276	65535	38442	12960
62251	65535	38461	12961
62270	65535	38453	12963
62258	65535	38388	12962
62251	65535	38433	12957
62244	65535	38433	12961
62270	65535	38433	12961
62276	65535	38418	12961
62276	65535	38418	12959
62283	65535	38410	12959
62290	65535	38365	12959
62264	65535	38345	12955
62270	65535	38337	12954
62251	65535	38337	12953
62283	65535	38398	12953
62264	65535	38380	12958
62270	65535	38329	12956
62276	65535	38375	12952
62270	65535	38360	12956
62257	65535	38375	12955
62264	65535	38368	12956
62276	65535	38371	12955
62244	65535	38310	12956
62264	65535	38305	12951
62264	65535	38325	12950
62244	65535	38340	12952
62244	65535	38343	12953
62270	65535	38340	12953
62270	65535	38328	12953
62251	65535	38270	12952
62251	65535	38323	12948
62276	65535	38323	12952
62296	65535	38308	12952
62244	65535	38247	12951
62244	65535	38270	12946
62244	65535	38234	12948
62276	65535	38288	12945
62244	65535	38239	12949
62290	65535	38288	12945
62244	65535	38239	12949
62270	65535	38268	12945
62244	65535	38230	12947
62264	65535	38253	12944
62264	65535	38199	12946
62264	65535	38227	12942
62244	65535	38210	12944
62238	65535	38184	12943
62238	65535	38171	12941
62251	65535	38176	12940
62244	65535	38213	12940
62244	65535	38214	12943
62270	65535	38206	12943
62264	65535	38207	12942
62251	65535	38221	12943
62244	65535	38202	12944
62257	65535	38144	12942
62244	65535	38144	12938
62264	65535	38144	12938
62264	65535	38131	12938
62270	65535	38178	12936
62270	65535	38162	12940
62270	65535	38158	12939
62270	65535	38158	12939
62244	65535	38143	12939
62244	65535	38150	12937
62244	65535	38088	12938
62225	65535	38088	12933
62244	65535	38080	12933
62244	65535	38104	12932
62264	65535	38127	12934
62244	65535	38065	12936
62244	65535	38127	12931
62276	65535	38127	12936
62251	65535	38110	12936
62264	65535	38095	12935
62251	65535	38091	12934
62232	65535	38099	12933
62244	65535	38095	12934
62244	65535	38037	12934
62238	65535	38056	12929
62238	65535	38040	12930
62232	65535	38087	12929
62225	65535	38032	12933
62244	65535	38064	12929
62244	65535	38032	12931
62251	65535	38063	12929
62225	65535	38048	12931
62238	65535	38067	12930
62199	65535	38017	12931
62205	65535	38063	12927
62218	65535	38052	12931
62238	65535	38039	12930
62225	65535	38012	12929
62244	65535	37997	12927
62238	65535	38032	12926
62212	65535	38012	12929
62238	65535	38032	12927
62251	65535	38008	12929
62244	65535	37992	12927
62244	65535	38032	12925
62244	65535	37961	12929
62244	65535	37961	12923
62264	65535	38012	12923
62244	65535	37992	12927
62238	65535	38012	12925
62199	65535	37945	12927
62218	65535	37996	12922
62232	65535	37992	12926
62238	65535	37941	12925
62244	65535	37960	12921
62232	65535	37992	12923
62281	65535	37960	12925
62275	65535	37940	12923
62218	65535	37944	12921
62238	65535	37905	12922
62244	65535	37937	12918
62205	65535	37921	12921
62205	65535	37937	12920
62244	65535	37929	12921
62238	65535	37954	12920
62256	65535	37904	12922
62251	65535	37912	12918
62238	65535	37885	12919
62218	65535	37853	12917
62218	65535	37853	12914
62218	65535	37853	12914
62238	65535	37845	12914
62244	65535	37849	12914
62238	65535	37805	12914
62218	65535	37837	12911
62218	65535	37853	12913
62218	65535	37821	12914
62225	65535	37785	12912
62244	65535	37828	12909
62218	65535	37809	12912
62218	65535	37817	12911
62218	65535	37825	12911
62212	65535	37820	12912
62218	65535	37797	12912
62218	65535	37797	12910
62206	65535	37752	12910
62193	65535	37752	12906
62199	65535	37717	12906
62199	65535	37733	12904
62218	65535	37744	12905
62199	65535	37680	12906
62218	65535	37716	12901
62218	65535	37668	12904
62232	65535	37680	12900
62212	65535	37736	12901
62212	65535	37720	12905
62199	65535	37664	12904
62212	65535	37700	12899
62212	65535	37696	12902
62212	65535	37700	12902
62205	65535	37680	12902
62212	65535	37660	12901
62218	65535	37628	12899
62218	65535	37604	12897
62193	65535	37676	12895
62218	65535	37648	12900
62212	65535	37672	12898
62199	65535	37612	12900
62193	65535	37632	12895
62173	65535	37628	12897
62193	65535	37571	12897
62199	65535	37608	12892
62205	65535	37551	12895
62225	65535	37608	12891
62212	65535	37608	12895
62173	65535	37608	12895
62199	65535	37604	12895
62199	65535	37575	12895
62193	65535	37514	12892
62193	65535	37510	12888
62186	65535	37555	12887
62193	65535	37494	12891
62180	65535	37559	12886
62199	65535	37478	12891
62173	65535	37474	12885
62186	65535	37466	12885
62212	65535	37535	12884
62186	65535	37519	12889
62186	65535	37494	12888
62173	65535	37519	12886
62193	65535	37421	12888
62193	65535	37502	12880
62193	65535	37421	12887
62199	65535	37482	12880
62186	65535	37466	12885
62206	65535	37470	12884
62212	65535	37486	12884
62193	65535	37486	12886
62193	65535	37389	12886
62173	65535	37401	12878
62199	65535	37450	12879
62199	65535	37462	12883
62154	65535	37462	12884
62193	65535	37446	12884
62193	65535	37376	12882
62193	65535	37421	12877
62173	65535	37347	12880
62186	65535	37347	12875
62180	65535	37347	12875
62173	65535	37393	12875
62167	65535	37409	12878
62186	65535	37335	12880
62173	65535	37376	12874
62193	65535	37323	12877
62186	65535	37364	12873
62193	65535	37352	12876
62193	65535	37360	12875
62147	65535	37286	12876
62167	65535	37356	12870
62167	65535	37344	12875
62193	65535	37323	12874
62167	65535	37257	12873
62206	65535	37299	12868
62186	65535	37303	12871
62141	65535	37311	12871
62167	65535	37291	12872
62186	65535	37283	12870
62141	65535	37274	12870
62167	65535	37241	12869
62141	65535	37245	12867
62167	65535	37266	12867
62167	65535	37192	12868
62173	65535	37233	12863
62186	65535	37233	12866
62173	65535	37175	12866
62160	65535	37208	12861
62160	65535	37205	12864
62154	65535	37193	12864
62160	65535	37201	12863
62167	65535	37168	12863
62167	65535	37159	12861
62160	65535	37168	12860
62167	65535	37176	12861
62147	65535	37168	12862
62147	65535	37101	12861
62160	65535	37139	12856
62160	65535	37147	12859
62121	65535	37134	12859
62160	65535	37139	12858
62141	65535	37114	12859
62134	65535	37134	12857
62141	65535	37047	12858
62167	65535	37110	12852
62147	65535	37102	12856
62167	65535	37064	12856
62160	65535	37085	12853
62167	65535	37077	12854
62141	65535	37027	12854
62141	65535	37060	12850
62141	65535	37010	12853
62160	65535	37036	12849
62160	65535	36998	12851
62180	65535	37048	12848
62160	65535	37040	12852
62153	65535	37031	12851
62141	65535	37011	12850
62141	65535	36998	12849
62141	65535	36989	12848
62160	65535	36944	12847
62147	65535	36977	12844
62141	65535	36974	12846
62141	65535	36961	12846
62160	65535	36932	12845
62141	65535	36915	12843
62141	65535	36873	12842
62121	65535	36861	12838
62160	65535	36839	12838
62167	65535	36878	12836
62141	65535	36869	12839
62141	65535	36861	12838
62141	65535	36844	12838
62134	65535	36827	12836
62160	65535	36777	12835
62147	65535	36815	12831
62108	65535	36769	12834
62108	65535	36803	12831
62114	65535	36735	12833
62114	65535	36718	12828
62134	65535	36777	12827
62141	65535	36718	12831
62114	65535	36740	12827
62095	65535	36740	12828
62114	65535	36719	12828
62134	65535	36723	12827
62121	65535	36719	12827
62114	65535	36680	12827
62134	65535	36709	12824
62114	65535	36671	12826
62114	65535	36677	12823
62121	65535	36677	12824
62121	65535	36682	12824
62114	65535	36668	12824
62108	65535	36625	12823
62141	65535	36668	12820
62082	65535	36613	12823
62121	65535	36651	12819
62121	65535	36608	12822
62108	65535	36636	12819
62141	65535	36561	12821
62114	65535	36625	12815
62134	65535	36613	12820
62114	65535	36561	12819
62114	65535	36584	12815
62108	65535	36541	12817
62081	65535	36536	12813
62114	65535	36570	12813
62088	65535	36550	12816
62127	65535	36558	12814
62108	65535	36536	12815
62094	65535	36541	12813
62108	65535	36532	12813
62088	65535	36472	12813
62095	65535	36480	12808
62088	65535	36480	12809
62134	65535	36472	12809
62101	65535	36472	12808
62088	65535	36466	12808
62114	65535	36503	12808
62108	65535	36451	12811
62108	65535	36468	12807
62108	65535	36465	12808
62114	65535	36431	12808
62095	65535	36457	12805
62108	65535	36454	12807
62114	65535	36448	12807
62101	65535	36448	12806
62088	65535	36387	12806
62108	65535	36408	12802
62088	65535	36370	12803
62108	65535	36396	12801
62108	65535	36390	12803
62108	65535	36396	12802
62088	65535	36361	12803
62108	65535	36332	12800
62049	65535	36326	12798
62102	65535	36329	12797
62075	65535	36305	12798
62108	65535	36294	12796
62081	65535	36297	12795
62108	65535	36320	12795
62075	65535	36311	12797
62088	65535	36276	12796
62081	65535	36276	12794
62088	65535	36285	12794
62108	65535	36267	12794
62088	65535	36247	12793
62075	65535	36232	12792
62088	65535	36241	12790
62081	65535	36206	12791
62081	65535	36188	12789
62081	65535	36223	12787
62101	65535	36215	12790
62062	65535	36215	12789
62081	65535	36147	12789
62088	65535	36150	12784
62081	65535	36150	12784
62094	65535	36153	12784
62081	65535	36129	12785
62075	65535	36150	12783
62088	65535	36159	12784
62081	65535	36112	12785
62081	65535	36103	12782
62042	65535	36094	12781
62068	65535	36129	12780
62069	65535	36112	12783
62062	65535	36067	12782
62062	65535	36059	12778
62088	65535	36067	12778
62081	65535	36059	12778
62075	65535	36050	12778
62088	65535	36023	12777
62081	65535	36059	12775
62081	65535	36020	12778
62042	65535	36059	12775
62088	65535	35996	12778
62081	65535	36059	12773
62062	65535	36050	12778
62042	65535	36047	12777
62036	65535	36023	12777
62036	65535	36023	12775
62081	65535	35994	12775
62062	65535	36029	12773
62055	65535	36005	12776
62048	65535	36002	12774
62062	65535	36011	12774
62075	65535	35958	12774
62062	65535	35991	12770
62055	65535	35961	12773
62075	65535	35949	12771
62055	65535	35973	12770
62062	65535	35973	12771
62049	65535	35928	12771
62075	65535	35955	12768
62062	65535	35937	12770
62036	65535	35916	12769
62016	65535	35928	12767
62055	65535	35884	12768
62048	65535	35895	12765
62062	65535	35893	12766
62062	65535	35902	12766
62055	65535	35884	12766
62062	65535	35884	12765
62062	65535	35886	12765
62055	65535	35881	12765
62036	65535	35857	12765
62062	65535	35857	12763
62075	65535	35776	12763
62029	65535	35827	12757
62036	65535	35836	12761
62055	65535	35800	12761
62036	65535	35800	12759
62075	65535	35836	12759
62055	65535	35809	12761
62036	65535	35764	12759
62055	65535	35773	12756
62048	65535	35782	12757
62036	65535	35780	12758
62055	65535	35755	12757
62048	65535	35737	12756
62022	65535	35728	12754
62036	65535	35719	12754
62055	65535	35719	12753
62029	65535	35701	12753
62055	65535	35699	12752
62022	65535	35701	12752
62029	65535	35690	12752
62042	65535	35672	12751
62036	65535	35678	12750
62048	65535	35681	12750
62062	65535	35653	12750
62022	65535	35653	12748
62022	65535	35653	12748
62036	65535	35635	12748
62016	65535	35644	12747
62042	65535	35626	12748
62036	65535	35629	12746
62042	65535	35606	12747
61997	65535	35606	12745
62042	65535	35617	12745
62036	65535	35615	12746
62029	65535	35617	12746
62036	65535	35545	12746
62009	65535	35590	12741
62029	65535	35581	12744
62036	65535	35581	12743
62075	65535	35551	12743
62036	65535	35554	12741
62029	65535	35563	12741
62009	65535	35569	12742
62029	65535	35576	12742
62036	65535	35515	12743
62029	65535	35515	12738
62022	65535	35545	12738
62009	65535	35506	12741
62022	65535	35531	12738
62029	65535	35506	12740
62036	65535	35536	12738
62022	65535	35506	12740
62029	65535	35524	12738
62029	65535	35469	12739
62009	65535	35469	12735
62029	65535	35460	12735
62022	65535	35451	12734
61997	65535	35451	12734
62002	65535	35442	12734
62029	65535	35451	12733
62009	65535	35453	12734
62036	65535	35424	12734
62022	65535	35421	12732
62029	65535	35460	12732
62009	65535	35439	12734
61983	65535	35412	12733
61983	65535	35430	12731
62022	65535	35430	12732
62002	65535	35430	12732
62002	65535	35403	12732
62002	65535	35412	12730
62009	65535	35375	12731
62009	65535	35375	12728
62002	65535	35394	12728
62009	65535	35387	12730
62009	65535	35341	12729
62002	65535	35394	12726
61990	65535	35339	12730
62009	65535	35330	12726
62029	65535	35339	12725
62009	65535	35366	12726
62002	65535	35304	12728
61995	65535	35320	12723
61983	65535	35332	12725
62022	65535	35339	12725
62009	65535	35330	12726
62022	65535	35284	12725
62029	65535	35311	12722
62002	65535	35284	12724
61983	65535	35304	12722
62002	65535	35284	12723
62002	65535	35247	12722
61963	65535	35265	12719
62009	65535	35245	12721
62002	65535	35265	12719
61976	65535	35238	12721
61976	65535	35238	12719
61995	65535	35212	12719
61983	65535	35201	12717
62002	65535	35228	12716
62022	65535	35228	12718
61983	65535	35228	12718
61990	65535	35219	12718
61983	65535	35182	12717
62022	65535	35191	12715
62002	65535	35154	12715
62002	65535	35182	12713
61983	65535	35201	12715
62002	65535	35171	12716
61983	65535	35182	12714
62002	65535	35154	12715
62009	65535	35115	12713
61995	65535	35162	12710
61976	65535	35108	12713
61990	65535	35108	12710
61995	65535	35108	12710
61976	65535	35095	12710
62002	65535	35099	12709
62002	65535	35136	12709
61983	65535	35115	12712
61983	65535	35117	12710
61983	65535	35080	12710
61990	65535	35080	12708
61990	65535	35117	12708
61976	65535	35115	12710
61976	65535	35050	12710
61990	65535	35062	12706
61956	65535	35080	12706
61976	65535	35052	12708
61995	65535	35099	12706
61956	65535	35052	12709
61983	65535	35099	12706
61983	65535	35043	12709
62002	65535	35078	12705
61995	65535	35071	12708
61963	65535	35080	12707
61976	65535	35050	12708
61976	65535	35078	12706
61970	65535	35041	12708
62002	65535	35069	12705
61983	65535	35087	12707
61990	65535	35030	12708
61990	65535	35069	12704
61963	65535	35022	12707
61983	65535	35015	12704
62002	65535	35058	12703
61983	65535	35004	12706
61956	65535	35015	12702
61983	65535	35006	12703
61949	65535	35002	12703
61990	65535	34985	12702
61976	65535	34976	12701
61976	65535	35041	12700
61976	65535	35030	12705
61976	65535	35025	12704
61976	65535	35013	12704
61976	65535	34997	12703
61995	65535	34997	12702
61989	65535	34969	12702
61989	65535	34997	12700
61976	65535	35004	12702
61976	65535	34959	12702
61963	65535	34950	12699
61983	65535	34959	12699
61976	65535	34987	12699
61995	65535	34927	12701
61983	65535	34985	12697
61976	65535	34974	12701
61976	65535	34987	12700
61989	65535	34978	12701
62002	65535	34985	12701
61995	65535	34985	12701
61969	65535	34976	12701
61956	65535	34948	12700
61969	65535	34967	12698
61983	65535	34901	12700
62002	65535	34969	12695
61963	65535	34931	12700
61969	65535	34927	12697
61995	65535	34948	12697
61976	65535	34969	12698
61949	65535	34892	12700
61983	65535	34913	12695
61976	65535	34873	12696
61969	65535	34931	12693
61983	65535	34913	12697
61969	65535	34939	12696
61969	65535	34931	12698
61976	65535	34875	12697
61995	65535	34913	12693
61976	65535	34920	12696
61956	65535	34913	12697
61930	65535	34911	12696
61989	65535	34883	12696
61983	65535	34909	12694
61969	65535	34875	12696
61976	65535	34894	12693
61989	65535	34911	12695
61963	65535	34856	12696
61976	65535	34890	12692
61969	65535	34875	12694
61976	65535	34838	12693
61976	65535	34901	12691
61962	65535	34836	12695
61956	65535	34836	12691
61995	65535	34838	12691
61995	65535	34836	12691
61976	65535	34855	12691
61969	65535	34856	12692
61962	65535	34866	12692
61949	65535	34883	12693
61976	65535	34856	12694
61942	65535	34838	12692
61976	65535	34864	12691
61949	65535	34838	12693
61949	65535	34855	12691
61976	65535	34838	12692
61976	65535	34871	12691
61976	65535	34800	12693
61949	65535	34838	12688
61969	65535	34862	12691
61969	65535	34781	12692
61949	65535	34845	12687
61983	65535	34780	12691
61949	65535	34778	12687
61956	65535	34819	12687
61935	65535	34778	12689
61969	65535	34819	12687
62002	65535	34763	12689
61976	65535	34800	12686
61989	65535	34763	12688
61976	65535	34819	12686
61942	65535	34761	12689
61949	65535	34734	12685
61976	65535	34787	12684
61976	65535	34781	12687
61949	65535	34763	12687
61956	65535	34714	12686
61930	65535	34742	12682
61969	65535	34721	12684
61976	65535	34768	12683
61956	65535	34744	12686
61983	65535	34703	12684
61956	65535	34772	12682
61995	65535	34704	12686
61930	65535	34704	12682
61976	65535	34697	12682
61969	65535	34733	12681
61956	65535	34750	12684
61976	65535	34734	12685
61949	65535	34751	12684
61969	65535	34742	12685
61983	65535	34725	12684
61976	65535	34742	12683
61949	65535	34704	12684
61949	65535	34725	12682
61949	65535	34704	12683
61956	65535	34706	12682
61956	65535	34667	12682
61949	65535	34648	12679
61976	65535	34668	12678
61976	65535	34668	12679
61949	65535	34685	12679
61976	65535	34649	12680
61976	65535	34712	12678
61956	65535	34687	12682
61937	65535	34667	12680
61969	65535	34714	12679
61942	65535	34667	12682
61963	65535	34629	12679
61976	65535	34631	12676
61949	65535	34678	12677
61969	65535	34685	12680
61949	65535	34649	12680
61923	65535	34665	12678
61937	65535	34593	12679
61949	65535	34649	12674
61956	65535	34612	12678
61956	65535	34610	12675
61949	65535	34631	12675
61949	65535	34638	12677
61923	65535	34659	12677
61976	65535	34659	12678
61956	65535	34593	12678
61949	65535	34612	12674
61949	65535	34591	12675
61944	65535	34618	12674
61956	65535	34574	12676
61956	65535	34618	12673
61949	65535	34612	12676
61976	65535	34610	12675
61949	65535	34574	12675
61930	65535	34574	12673
61956	65535	34621	12673
61937	65535	34621	12676
61949	65535	34612	12676
61976	65535	34612	12675
61969	65535	34545	12675
61923	65535	34574	12671
61937	65535	34545	12673
61956	65535	34610	12671
61949	65535	34593	12675
61956	65535	34591	12674
61949	65535	34593	12674
61930	65535	34547	12674
61942	65535	34593	12671
61942	65535	34555	12674
61962	65535	34545	12671
61949	65535	34574	12671
61923	65535	34536	12673
61956	65535	34593	12670
61976	65535	34574	12674
61949	65535	34517	12673
61949	65535	34593	12669
61949	65535	34583	12674
61949	65535	34553	12673
61949	65535	34555	12671
61969	65535	34517	12671
61949	65535	34517	12669
61949	65535	34563	12669
61962	65535	34553	12672
61930	65535	34545	12671
61956	65535	34498	12671
61949	65535	34498	12668
61969	65535	34526	12668
61949	65535	34526	12669
61942	65535	34525	12669
61923	65535	34506	12669
61942	65535	34498	12668
61949	65535	34507	12668
61949	65535	34498	12668
61942	65535	34498	12668
61923	65535	34488	12668
61956	65535	34477	12667
61949	65535	34422	12666
61949	65535	34403	12662
61923	65535	34441	12661
61956	65535	34460	12664
61930	65535	34441	12665
61983	65535	34450	12664
61942	65535	34431	12664
61937	65535	34449	12663
61937	65535	34431	12664
61916	65535	34433	12663
61923	65535	34403	12663
61910	65535	34422	12661
61923	65535	34431	12662
61930	65535	34403	12663
61930	65535	34403	12661
61896	65535	34430	12661
61923	65535	34403	12663
61949	65535	34403	12661
61935	65535	34404	12661
61923	65535	34392	12661
61930	65535	34401	12660
61949	65535	34403	12661
61896	65535	34422	12661
61923	65535	34393	12662
61942	65535	34393	12660
61923	65535	34393	12660
61923	65535	34346	12660
61949	65535	34384	12657
61916	65535	34382	12660
61937	65535	34385	12660
61930	65535	34384	12660
61942	65535	34385	12660
61923	65535	34384	12660
61942	65535	34393	12660
61896	65535	34385	12660
61930	65535	34384	12660
61949	65535	34366	12660
61930	65535	34317	12659
61930	65535	34366	12655
61935	65535	34336	12659
61923	65535	34384	12656
61923	65535	34376	12660
61930	65535	34374	12659
61923	65535	34355	12659
61930	65535	34309	12658
61903	65535	34308	12655
61923	65535	34309	12655
61916	65535	34346	12655
61923	65535	34346	12657
61942	65535	34355	12657
61949	65535	34336	12658
61923	65535	34347	12656
61923	65535	34355	12657
61949	65535	34328	12658
61930	65535	34338	12656
61942	65535	34328	12657
61949	65535	34327	12656
61916	65535	34338	12656
61916	65535	34327	12657
61903	65535	34309	12656
61923	65535	34299	12655
61930	65535	34290	12654
61935	65535	34308	12653
61903	65535	34291	12655
61903	65535	34290	12653
61942	65535	34253	12653
61923	65535	34272	12651
61935	65535	34252	12652
61923	65535	34271	12651
61930	65535	34222	12652
61903	65535	34280	12649
61923	65535	34269	12653
61910	65535	34215	12652
61949	65535	34271	12648
61930	65535	34241	12652
61923	65535	34243	12650
61935	65535	34232	12650
61896	65535	34241	12649
61916	65535	34232	12650
61903	65535	34234	12649
61930	65535	34232	12650
61916	65535	34232	12649
61916	65535	34223	12649
61903	65535	34213	12649
61942	65535	34213	12648
61903	65535	34212	12648
61923	65535	34212	12648
61903	65535	34231	12648
61876	65535	34194	12649
61930	65535	34194	12647
61949	65535	34205	12647
61896	65535	34185	12648
61903	65535	34194	12646
61923	65535	34090	12640
61903	65535	34089	12640
61923	65535	34099	12640
61896	65535	34101	12640
61896	65535	34080	12641
61908	65535	34072	12639
61903	65535	34071	12639
61923	65535	34061	12638
61916	65535	34043	12638
61903	65535	34042	12637
61903	65535	33974	12637
61923	65535	34024	12632
61903	65535	34061	12635
61916	65535	34042	12638
61896	65535	34004	12637
61916	65535	33985	12634
61896	65535	34022	12633
61903	65535	34004	12635
61896	65535	34014	12634
61869	65535	33985	12635
61903	65535	34004	12633
61916	65535	33995	12634
61896	65535	33975	12633
61876	65535	33946	12632
61903	65535	33994	12630
61923	65535	33966	12633
61916	65535	33985	12631
61903	65535	33976	12633
61910	65535	33927	12632
61908	65535	33975	12629
61896	65535	33879	12632
61896	65535	33945	12626
61889	65535	33926	12630
61896	65535	33908	12629
61903	65535	33908	12628
61896	65535	33927	12628
61903	65535	33926	12629
61896	65535	33889	12629
61876	65535	33850	12626
61876	65535	33899	12624
61903	65535	33908	12627
61889	65535	33909	12628
61896	65535	33898	12628
61930	65535	33899	12627
61889	65535	33888	12627
61857	65535	33909	12626
61896	65535	33851	12628
61896	65535	33870	12624
61903	65535	33860	12625
61896	65535	33822	12624
61896	65535	33860	12622
61923	65535	33822	12624
61896	65535	33840	12622
61876	65535	33812	12623
61884	65535	33831	12621
61903	65535	33812	12622
61876	65535	33812	12621
61896	65535	33784	12621
61876	65535	33774	12619
61896	65535	33803	12619
61889	65535	33803	12621
61876	65535	33802	12621
61896	65535	33755	12620
61850	65535	33793	12617
61876	65535	33793	12620
61889	65535	33764	12620
61876	65535	33773	12618
61876	65535	33764	12618
61903	65535	33716	12618
61876	65535	33697	12615
61857	65535	33725	12613
61869	65535	33678	12615
61889	65535	33734	12612
61869	65535	33697	12616
[truncated: 222,974 more rows]
