# Supplementary material for: Suppression Method of Jump Points for Multipole Magnetic Encoder at Low Temperature Based on Single-Pole Angle Value Fitting
Source: Hindawi journal article supplement (doi:10.1155/2019/7893462), 2019-03-19
Supplement: f2 [file 7893462.f2.txt]

57523	65535	1667	1744
57523	65535	1667	1744
57523	65535	1667	1744
57523	65535	1667	1745
57523	65535	1666	1741
57523	65535	1667	1742
57523	65535	1666	1742
57523	65535	1667	1743
57524	65535	1667	1745
57523	65535	1666	1742
57523	65535	1666	1743
57523	65535	1668	1744
57523	65535	1667	1744
57523	65535	1667	1744
57523	65535	1667	1744
57523	65535	1666	1744
57523	65535	1668	1743
57523	65535	1668	1743
57524	65535	1666	1744
57522	65535	1666	1744
57523	65535	1666	1745
57523	65535	1667	1745
57524	65535	1667	1744
57523	65535	1668	1744
57524	65535	1666	1743
57523	65535	1667	1744
57523	65535	1667	1743
57523	65535	1667	1744
57523	65535	1667	1743
57523	65535	1667	1744
57523	65535	1666	1744
57523	65535	1666	1743
57524	65535	1667	1743
57523	65535	1667	1745
57523	65535	1667	1743
57523	65535	1668	1744
57523	65535	1666	1744
57523	65535	1666	1743
57525	65535	1666	1744
57523	65535	1667	1742
57522	65535	1665	1745
57523	65535	1667	1744
57523	65535	1666	1743
57523	65535	1669	1743
57523	65535	1667	1744
57523	65535	1666	1743
57523	65535	1667	1744
57523	65535	1666	1742
57523	65535	1668	1743
57523	65535	1668	1744
57523	65535	1667	1743
57524	65535	1667	1744
57523	65535	1667	1744
57523	65535	1667	1743
57523	65535	1666	1744
57523	65535	1667	1743
57523	65535	1668	1744
57523	65535	1668	1743
57523	65535	1667	1743
57523	65535	1666	1743
57522	65535	1666	1745
57523	65535	1667	1745
57523	65535	1667	1742
57523	65535	1666	1744
57523	65535	1666	1744
57524	65535	1667	1742
57523	65535	1667	1742
57523	65535	1667	1743
57523	65535	1666	1744
57523	65535	1666	1743
57523	65535	1667	1743
57523	65535	1667	1744
57523	65535	1666	1742
57523	65535	1667	1743
57523	65535	1668	1742
57522	65535	1668	1744
57523	65535	1668	1744
57523	65535	1667	1743
57523	65535	1668	1743
57523	65535	1666	1744
57523	65535	1665	1744
57523	65535	1667	1743
57523	65535	1666	1742
57523	65535	1666	1743
57523	65535	1667	1742
57523	65535	1667	1744
57523	65535	1667	1743
57523	65535	1667	1744
57523	65535	1668	1743
57523	65535	1667	1743
57523	65535	1666	1742
57523	65535	1667	1743
57524	65535	1665	1743
57523	65535	1666	1743
57523	65535	1667	1743
57523	65535	1666	1744
57524	65535	1666	1742
57523	65535	1668	1743
57523	65535	1667	1744
57523	65535	1667	1744
57524	65535	1665	1742
57523	65535	1666	1742
57523	65535	1668	1743
57523	65535	1666	1744
57524	65535	1664	1743
57523	65535	1667	1743
57522	65535	1667	1742
57523	65535	1666	1743
57524	65535	1666	1743
57523	65535	1668	1743
57523	65535	1667	1743
57523	65535	1666	1742
57523	65535	1665	1744
57524	65535	1666	1744
57523	65535	1666	1743
57523	65535	1668	1743
57523	65535	1666	1745
57524	65535	1667	1742
57524	65535	1667	1745
57523	65535	1666	1743
57523	65535	1665	1745
57522	65535	1667	1744
57523	65535	1666	1744
57523	65535	1666	1743
57523	65535	1667	1744
57523	65535	1665	1744
57523	65535	1666	1744
57524	65535	1666	1743
57524	65535	1666	1742
57523	65535	1666	1744
57523	65535	1666	1743
57523	65535	1665	1744
57523	65535	1666	1744
57524	65535	1666	1744
57524	65535	1666	1743
57523	65535	1669	1744
57523	65535	1668	1745
57523	65535	1668	1744
57523	65535	1666	1743
57524	65535	1667	1743
57523	65535	1668	1744
57523	65535	1666	1743
57523	65535	1666	1744
57523	65535	1665	1744
57523	65535	1666	1742
57523	65535	1667	1743
57523	65535	1665	1745
57524	65535	1667	1743
57523	65535	1667	1744
57523	65535	1668	1744
57523	65535	1667	1745
57522	65535	1667	1745
57523	65535	1665	1744
57523	65535	1666	1744
57524	65535	1666	1744
57523	65535	1667	1744
57523	65535	1666	1742
57523	65535	1666	1743
57522	65535	1666	1742
57523	65535	1666	1741
57523	65535	1666	1744
57523	65535	1669	1743
57523	65535	1668	1743
57524	65535	1667	1744
57523	65535	1667	1743
57523	65535	1666	1744
57523	65535	1666	1744
57523	65535	1666	1744
57523	65535	1668	1742
57524	65535	1666	1743
57524	65535	1665	1743
57522	65535	1667	1742
57522	65535	1666	1743
57523	65535	1666	1744
57523	65535	1665	1741
57523	65535	1666	1744
57524	65535	1666	1743
57523	65535	1666	1743
57524	65535	1667	1743
57523	65535	1666	1744
57522	65535	1666	1744
57523	65535	1668	1742
57523	65535	1666	1743
57523	65535	1667	1743
57524	65535	1666	1743
57523	65535	1667	1743
57523	65535	1668	1743
57523	65535	1667	1742
57524	65535	1667	1743
57523	65535	1666	1744
57523	65535	1666	1742
57524	65535	1667	1745
57523	65535	1667	1742
57523	65535	1667	1744
57523	65535	1667	1743
57523	65535	1666	1743
57524	65535	1666	1744
57523	65535	1664	1744
57523	65535	1666	1744
57523	65535	1666	1744
57524	65535	1667	1743
57523	65535	1666	1743
57522	65535	1668	1743
57524	65535	1667	1743
57523	65535	1668	1744
57523	65535	1667	1744
57524	65535	1667	1742
57523	65535	1667	1744
57523	65535	1666	1744
57524	65535	1666	1743
57522	65535	1668	1744
57523	65535	1666	1744
57523	65535	1665	1744
57523	65535	1668	1743
57523	65535	1666	1746
57523	65535	1667	1744
57523	65535	1667	1744
57523	65535	1667	1743
57522	65535	1667	1745
57523	65535	1667	1742
57523	65535	1668	1744
57523	65535	1667	1744
57523	65535	1664	1742
57524	65535	1667	1742
57523	65535	1665	1744
57523	65535	1667	1744
57523	65535	1667	1743
57523	65535	1667	1743
57524	65535	1667	1744
57523	65535	1668	1744
57523	65535	1667	1744
57523	65535	1666	1743
57522	65535	1666	1745
57523	65535	1665	1743
57523	65535	1666	1743
57524	65535	1666	1745
57524	65535	1668	1743
57523	65535	1666	1743
57524	65535	1669	1744
57523	65535	1667	1744
57523	65535	1665	1744
57523	65535	1668	1742
57523	65535	1666	1743
57523	65535	1665	1744
57523	65535	1666	1744
57523	65535	1667	1742
57523	65535	1667	1744
57523	65535	1667	1743
57523	65535	1666	1743
57523	65535	1666	1742
57523	65535	1667	1744
57523	65535	1667	1743
57523	65535	1668	1745
57523	65535	1666	1745
57523	65535	1666	1743
57523	65535	1668	1744
57523	65535	1668	1743
57523	65535	1666	1743
57523	65535	1667	1744
57523	65535	1667	1744
57523	65535	1668	1743
57524	65535	1668	1745
57524	65535	1667	1743
57524	65535	1667	1743
57523	65535	1667	1742
57523	65535	1666	1744
57523	65535	1668	1743
57523	65535	1667	1744
57523	65535	1667	1743
57523	65535	1667	1742
57522	65535	1666	1744
57523	65535	1667	1743
57523	65535	1668	1745
57523	65535	1667	1745
57523	65535	1666	1743
57523	65535	1666	1744
57524	65535	1667	1743
57523	65535	1667	1742
57523	65535	1667	1741
57523	65535	1666	1742
57523	65535	1665	1743
57523	65535	1667	1742
57524	65535	1666	1743
57523	65535	1667	1744
57523	65535	1666	1743
57523	65535	1668	1744
57524	65535	1666	1744
57524	65535	1666	1744
57522	65535	1667	1743
57524	65535	1667	1744
57523	65535	1667	1744
57523	65535	1666	1745
57523	65535	1668	1744
57523	65535	1668	1744
57523	65535	1667	1744
57524	65535	1666	1744
57524	65535	1667	1742
57523	65535	1667	1744
57523	65535	1665	1744
57523	65535	1667	1744
57523	65535	1667	1744
57524	65535	1668	1744
57524	65535	1667	1744
57523	65535	1666	1744
57524	65535	1668	1742
57523	65535	1668	1742
57522	65535	1666	1744
57523	65535	1666	1744
57523	65535	1667	1743
57523	65535	1668	1744
57523	65535	1667	1744
57524	65535	1667	1744
57523	65535	1667	1746
57523	65535	1667	1743
57523	65535	1665	1743
57524	65535	1667	1744
57523	65535	1667	1744
57523	65535	1666	1744
57522	65535	1668	1743
57523	65535	1668	1745
57523	65535	1666	1745
57523	65535	1665	1745
57524	65535	1667	1743
57523	65535	1667	1743
57523	65535	1667	1744
57523	65535	1667	1745
57523	65535	1666	1742
57523	65535	1666	1746
57523	65535	1665	1744
57523	65535	1667	1744
57523	65535	1666	1744
57523	65535	1666	1744
57524	65535	1666	1743
57523	65535	1667	1742
57523	65535	1666	1744
57523	65535	1665	1744
57523	65535	1667	1744
57523	65535	1666	1744
57523	65535	1667	1744
57523	65535	1667	1743
57523	65535	1666	1742
57523	65535	1667	1743
57524	65535	1667	1744
57523	65535	1667	1743
57523	65535	1667	1742
57524	65535	1668	1744
57523	65535	1666	1743
57524	65535	1667	1744
57523	65535	1665	1743
57523	65535	1667	1741
57523	65535	1667	1742
57523	65535	1667	1743
57523	65535	1667	1744
57523	65535	1667	1744
57523	65535	1667	1744
57523	65535	1666	1743
57522	65535	1667	1742
57524	65535	1667	1742
57524	65535	1668	1743
57524	65535	1666	1743
57524	65535	1667	1742
57523	65535	1667	1744
57523	65535	1667	1745
57523	65535	1666	1744
57524	65535	1667	1744
57523	65535	1666	1745
57523	65535	1666	1742
57523	65535	1668	1745
57522	65535	1666	1744
57523	65535	1668	1744
57523	65535	1667	1744
57523	65535	1667	1743
57524	65535	1666	1744
57524	65535	1667	1744
57522	65535	1668	1743
57523	65535	1667	1743
57524	65535	1666	1745
57523	65535	1667	1744
57523	65535	1666	1744
57523	65535	1667	1743
57523	65535	1666	1743
57523	65535	1665	1745
57523	65535	1667	1744
57523	65535	1668	1743
57523	65535	1666	1743
57522	65535	1667	1744
57523	65535	1667	1742
57524	65535	1666	1745
57524	65535	1666	1742
57523	65535	1666	1743
57524	65535	1666	1742
57523	65535	1668	1745
57523	65535	1666	1742
57524	65535	1667	1741
57523	65535	1665	1744
57523	65535	1666	1742
57523	65535	1666	1743
57524	65535	1668	1743
57523	65535	1665	1744
57524	65535	1666	1744
57523	65535	1667	1744
57523	65535	1666	1745
57522	65535	1667	1743
57523	65535	1666	1745
57523	65535	1666	1744
57523	65535	1667	1744
57523	65535	1666	1743
57523	65535	1667	1744
57524	65535	1667	1744
57523	65535	1666	1743
57524	65535	1666	1744
57523	65535	1666	1744
57523	65535	1666	1743
57523	65535	1666	1743
57523	65535	1666	1743
57522	65535	1666	1743
57524	65535	1666	1744
57524	65535	1667	1744
57523	65535	1667	1744
57523	65535	1669	1742
57523	65535	1666	1743
57523	65535	1666	1742
57522	65535	1667	1743
57523	65535	1668	1743
57523	65535	1666	1742
57523	65535	1667	1743
57523	65535	1667	1742
57523	65535	1666	1742
57524	65535	1665	1744
57524	65535	1666	1742
57523	65535	1667	1745
57523	65535	1667	1745
57522	65535	1667	1743
57523	65535	1667	1744
57523	65535	1667	1742
57523	65535	1666	1742
57524	65535	1666	1744
57523	65535	1666	1744
57524	65535	1667	1742
57523	65535	1666	1744
57523	65535	1666	1743
57524	65535	1665	1744
57523	65535	1665	1742
57523	65535	1667	1744
57523	65535	1667	1743
57523	65535	1666	1743
57523	65535	1665	1743
57523	65535	1665	1744
57524	65535	1667	1740
57523	65535	1666	1743
57524	65535	1665	1741
57523	65535	1668	1744
57523	65535	1668	1745
57523	65535	1667	1743
57524	65535	1668	1744
57523	65535	1667	1743
57522	65535	1666	1743
57523	65535	1667	1743
57523	65535	1666	1743
57523	65535	1667	1743
57523	65535	1665	1743
57524	65535	1668	1744
57524	65535	1666	1743
57522	65535	1667	1744
57523	65535	1667	1743
57523	65535	1667	1744
57522	65535	1666	1744
57524	65535	1666	1743
57523	65535	1666	1744
57523	65535	1666	1743
57524	65535	1668	1743
57523	65535	1667	1743
57523	65535	1667	1744
57523	65535	1666	1742
57523	65535	1666	1745
57524	65535	1666	1742
57523	65535	1667	1744
57523	65535	1667	1744
57523	65535	1665	1743
57524	65535	1666	1743
57524	65535	1667	1743
57523	65535	1666	1744
57523	65535	1667	1743
57523	65535	1668	1743
57523	65535	1668	1743
57523	65535	1667	1744
57523	65535	1666	1742
57524	65535	1665	1742
57523	65535	1665	1743
57523	65535	1667	1743
57523	65535	1667	1743
57523	65535	1668	1742
57523	65535	1669	1744
57523	65535	1666	1742
57523	65535	1668	1743
57523	65535	1666	1744
57523	65535	1666	1744
57523	65535	1667	1744
57523	65535	1666	1743
57523	65535	1668	1744
57523	65535	1667	1744
57524	65535	1667	1743
57523	65535	1666	1743
57523	65535	1667	1743
57523	65535	1667	1743
57522	65535	1666	1743
57523	65535	1667	1743
57523	65535	1667	1743
57524	65535	1668	1745
57523	65535	1666	1745
57523	65535	1666	1744
57523	65535	1665	1743
57523	65535	1667	1743
57523	65535	1666	1741
57523	65535	1666	1744
57523	65535	1667	1743
57523	65535	1667	1744
57524	65535	1666	1744
57524	65535	1667	1744
57524	65535	1666	1743
57524	65535	1666	1743
57523	65535	1666	1743
57523	65535	1668	1745
57522	65535	1666	1743
57523	65535	1667	1743
57523	65535	1667	1744
57523	65535	1666	1744
57523	65535	1665	1743
57523	65535	1665	1745
57524	65535	1666	1743
57523	65535	1666	1743
57522	65535	1666	1744
57523	65535	1668	1743
57523	65535	1666	1744
57523	65535	1666	1743
57524	65535	1667	1744
57523	65535	1665	1743
57523	65535	1667	1743
57523	65535	1666	1744
57523	65535	1666	1743
57523	65535	1667	1744
57523	65535	1666	1744
57523	65535	1668	1743
57523	65535	1667	1743
57523	65535	1666	1744
57523	65535	1666	1743
57523	65535	1666	1742
57523	65535	1667	1745
57523	65535	1665	1743
57523	65535	1666	1743
57523	65535	1666	1743
57523	65535	1667	1742
57523	65535	1666	1742
57523	65535	1667	1745
57523	65535	1666	1744
57523	65535	1666	1744
57523	65535	1665	1743
57523	65535	1665	1743
57523	65535	1666	1742
57523	65535	1666	1744
57524	65535	1666	1743
57523	65535	1667	1744
57523	65535	1668	1744
57524	65535	1667	1743
57524	65535	1666	1742
57523	65535	1668	1743
57523	65535	1667	1743
57523	65535	1666	1743
57524	65535	1667	1743
57524	65535	1667	1743
57524	65535	1667	1743
57523	65535	1666	1742
57524	65535	1666	1743
57522	65535	1667	1744
57523	65535	1667	1743
57524	65535	1666	1744
57523	65535	1669	1742
57524	65535	1666	1745
57523	65535	1667	1742
57523	65535	1666	1745
57523	65535	1666	1744
57524	65535	1668	1744
57523	65535	1667	1743
57523	65535	1666	1743
57524	65535	1668	1743
57522	65535	1666	1744
57523	65535	1667	1744
57523	65535	1666	1744
57523	65535	1665	1743
57524	65535	1666	1743
57523	65535	1666	1743
57523	65535	1667	1742
57523	65535	1666	1744
57523	65535	1666	1743
57523	65535	1668	1744
57523	65535	1666	1742
57523	65535	1666	1743
57523	65535	1667	1743
57523	65535	1666	1744
57523	65535	1668	1744
57524	65535	1667	1744
57523	65535	1666	1744
57523	65535	1668	1743
57523	65535	1666	1743
57523	65535	1668	1744
57523	65535	1667	1744
57523	65535	1666	1743
57523	65535	1666	1743
57523	65535	1667	1744
57523	65535	1666	1743
57523	65535	1667	1745
57523	65535	1668	1743
57523	65535	1666	1744
57523	65535	1668	1744
57523	65535	1666	1744
57523	65535	1667	1743
57524	65535	1664	1743
57523	65535	1666	1743
57524	65535	1668	1743
57523	65535	1666	1741
57524	65535	1666	1744
57523	65535	1666	1743
57523	65535	1667	1743
57523	65535	1665	1743
57524	65535	1666	1743
57523	65535	1667	1743
57524	65535	1665	1743
57523	65535	1668	1743
57523	65535	1666	1745
57523	65535	1667	1744
57524	65535	1666	1743
57523	65535	1667	1743
57523	65535	1666	1744
57523	65535	1665	1743
57523	65535	1665	1744
57523	65535	1666	1744
57523	65535	1668	1745
57523	65535	1668	1742
57523	65535	1666	1744
57523	65535	1666	1743
57523	65535	1667	1742
57523	65535	1667	1744
57524	65535	1667	1743
57523	65535	1666	1742
57523	65535	1666	1743
57524	65535	1667	1744
57523	65535	1668	1744
57523	65535	1666	1743
57523	65535	1667	1744
57524	65535	1667	1744
57523	65535	1666	1743
57523	65535	1667	1743
57523	65535	1666	1743
57523	65535	1666	1743
57522	65535	1668	1744
57523	65535	1666	1743
57524	65535	1667	1743
57523	65535	1666	1743
57523	65535	1665	1744
57523	65535	1668	1743
57524	65535	1664	1743
57523	65535	1667	1744
57524	65535	1666	1742
57523	65535	1666	1744
57523	65535	1664	1744
57524	65535	1666	1744
57522	65535	1667	1742
57523	65535	1668	1744
57523	65535	1665	1743
57523	65535	1667	1743
57523	65535	1665	1744
57523	65535	1668	1743
57523	65535	1665	1744
57523	65535	1668	1746
57524	65535	1666	1743
57523	65535	1667	1743
57522	65535	1667	1743
57523	65535	1666	1743
57523	65535	1668	1743
57523	65535	1666	1743
57523	65535	1666	1744
57523	65535	1667	1742
57523	65535	1667	1743
57523	65535	1665	1744
57523	65535	1666	1743
57523	65535	1667	1743
57524	65535	1666	1743
57523	65535	1667	1743
57524	65535	1667	1743
57522	65535	1666	1744
57523	65535	1667	1744
57524	65535	1665	1743
57524	65535	1667	1744
57524	65535	1667	1743
57523	65535	1667	1743
57524	65535	1667	1744
57524	65535	1666	1743
57524	65535	1668	1744
57523	65535	1665	1744
57523	65535	1666	1743
57523	65535	1667	1745
57522	65535	1669	1744
57523	65535	1666	1744
57523	65535	1667	1744
57523	65535	1666	1743
57523	65535	1667	1743
57523	65535	1667	1745
57524	65535	1667	1744
57524	65535	1667	1745
57523	65535	1666	1745
57523	65535	1667	1742
57523	65535	1666	1744
57523	65535	1665	1743
57523	65535	1666	1742
57523	65535	1667	1743
57523	65535	1667	1744
57522	65535	1667	1742
57523	65535	1667	1744
57523	65535	1666	1742
57523	65535	1667	1744
57523	65535	1668	1744
57523	65535	1666	1744
57523	65535	1667	1742
57523	65535	1667	1743
57523	65535	1667	1744
57524	65535	1666	1743
57524	65535	1667	1742
57523	65535	1668	1743
57523	65535	1667	1743
57523	65535	1665	1744
57524	65535	1666	1743
57524	65535	1667	1742
57523	65535	1667	1745
57522	65535	1667	1744
57523	65535	1668	1744
57523	65535	1668	1743
57523	65535	1666	1742
57524	65535	1667	1743
57524	65535	1667	1744
57523	65535	1666	1743
57523	65535	1667	1743
57523	65535	1667	1744
57523	65535	1666	1743
57523	65535	1667	1742
57523	65535	1667	1744
57523	65535	1666	1743
57524	65535	1667	1744
57523	65535	1666	1744
57522	65535	1667	1743
57524	65535	1667	1743
57523	65535	1667	1743
57523	65535	1668	1743
57523	65535	1666	1745
57523	65535	1667	1745
57523	65535	1668	1744
57523	65535	1666	1742
57523	65535	1667	1743
57523	65535	1666	1744
57523	65535	1666	1744
57524	65535	1667	1745
57523	65535	1667	1742
57523	65535	1666	1744
57523	65535	1667	1744
57523	65535	1666	1745
57524	65535	1666	1743
57523	65535	1666	1742
57524	65535	1666	1744
57523	65535	1667	1744
57523	65535	1666	1744
57523	65535	1665	1743
57523	65535	1667	1743
57523	65535	1667	1742
57524	65535	1667	1743
57523	65535	1666	1742
57523	65535	1667	1744
57524	65535	1669	1745
57523	65535	1665	1743
57524	65535	1667	1745
57524	65535	1667	1742
57523	65535	1666	1744
57523	65535	1668	1744
57523	65535	1667	1743
57524	65535	1666	1743
57524	65535	1668	1744
57523	65535	1667	1743
57523	65535	1668	1744
57524	65535	1667	1743
57523	65535	1667	1742
57524	65535	1666	1742
57523	65535	1666	1744
57523	65535	1666	1744
57524	65535	1665	1742
57524	65535	1667	1746
57523	65535	1666	1742
57524	65535	1667	1744
57523	65535	1666	1744
57523	65535	1667	1743
57523	65535	1664	1744
57523	65535	1665	1743
57523	65535	1667	1744
57523	65535	1667	1743
57523	65535	1668	1743
57523	65535	1666	1743
57523	65535	1666	1743
57523	65535	1666	1745
57524	65535	1666	1742
57523	65535	1666	1743
57523	65535	1667	1745
57523	65535	1665	1742
57523	65535	1665	1744
57523	65535	1667	1744
57522	65535	1667	1743
57524	65535	1667	1742
57523	65535	1666	1743
57523	65535	1667	1742
57523	65535	1668	1743
57523	65535	1667	1744
57524	65535	1668	1743
57522	65535	1666	1744
57523	65535	1668	1743
57523	65535	1667	1743
57523	65535	1667	1742
57523	65535	1666	1745
57524	65535	1667	1743
57523	65535	1666	1745
57522	65535	1667	1743
57523	65535	1668	1744
57524	65535	1667	1742
57524	65535	1666	1742
57524	65535	1667	1744
57523	65535	1667	1744
57524	65535	1667	1744
57523	65535	1667	1744
57523	65535	1665	1744
57524	65535	1666	1742
57523	65535	1667	1744
57523	65535	1666	1744
57524	65535	1666	1742
57523	65535	1665	1742
57523	65535	1666	1743
57523	65535	1667	1743
57523	65535	1668	1743
57524	65535	1666	1743
57523	65535	1667	1743
57523	65535	1667	1744
57524	65535	1665	1744
57523	65535	1666	1744
57523	65535	1667	1743
57524	65535	1668	1745
57523	65535	1667	1743
57524	65535	1665	1743
57523	65535	1667	1743
57524	65535	1666	1742
57523	65535	1666	1743
57524	65535	1667	1744
57523	65535	1667	1745
57523	65535	1668	1742
57523	65535	1666	1742
57524	65535	1667	1744
57524	65535	1665	1744
57523	65535	1667	1745
57523	65535	1667	1744
57524	65535	1667	1743
57524	65535	1667	1742
57523	65535	1667	1743
57523	65535	1667	1744
57522	65535	1666	1741
57523	65535	1668	1744
57523	65535	1667	1743
57523	65535	1668	1744
57523	65535	1666	1744
57523	65535	1666	1742
57524	65535	1668	1743
57523	65535	1666	1743
57523	65535	1666	1744
57523	65535	1666	1743
57524	65535	1665	1742
57523	65535	1666	1745
57524	65535	1667	1742
57523	65535	1667	1743
57523	65535	1667	1743
57524	65535	1667	1743
57523	65535	1666	1743
57523	65535	1667	1743
57523	65535	1666	1743
57522	65535	1666	1744
57524	65535	1666	1743
57522	65535	1667	1744
57523	65535	1666	1744
57523	65535	1666	1744
57523	65535	1667	1745
57523	65535	1667	1744
57523	65535	1667	1742
57524	65535	1666	1743
57522	65535	1668	1744
57523	65535	1665	1743
57523	65535	1666	1745
57523	65535	1666	1744
57524	65535	1667	1744
57523	65535	1666	1743
57524	65535	1666	1743
57523	65535	1667	1744
57523	65535	1666	1743
57523	65535	1666	1744
57523	65535	1665	1743
57523	65535	1665	1744
57523	65535	1667	1743
57523	65535	1666	1744
57523	65535	1668	1743
57523	65535	1666	1745
57523	65535	1667	1745
57523	65535	1666	1744
57523	65535	1666	1744
57523	65535	1668	1745
57523	65535	1667	1743
57523	65535	1668	1743
57523	65535	1666	1744
57523	65535	1667	1744
57523	65535	1667	1742
57523	65535	1665	1743
57523	65535	1670	1744
57523	65535	1667	1744
57523	65535	1666	1743
57523	65535	1666	1744
57523	65535	1667	1744
57523	65535	1666	1744
57523	65535	1667	1743
57523	65535	1666	1742
57523	65535	1665	1744
57522	65535	1666	1744
57523	65535	1667	1745
57523	65535	1666	1744
57524	65535	1666	1745
57523	65535	1666	1743
57524	65535	1666	1743
57523	65535	1667	1744
57523	65535	1668	1745
57524	65535	1667	1743
57523	65535	1666	1743
57524	65535	1666	1743
57523	65535	1666	1742
57523	65535	1667	1743
57524	65535	1667	1743
57523	65535	1667	1743
57523	65535	1665	1743
57524	65535	1668	1742
57523	65535	1666	1742
57523	65535	1667	1744
57523	65535	1666	1743
57523	65535	1666	1744
57523	65535	1666	1745
57524	65535	1666	1744
57523	65535	1666	1744
57523	65535	1667	1744
57523	65535	1666	1744
57523	65535	1665	1743
57523	65535	1665	1744
57523	65535	1666	1745
57523	65535	1667	1743
57524	65535	1666	1743
57523	65535	1665	1744
57524	65535	1668	1744
57523	65535	1666	1743
57523	65535	1666	1743
57523	65535	1667	1743
57524	65535	1665	1742
57524	65535	1666	1744
57524	65535	1667	1744
57523	65535	1667	1742
57524	65535	1666	1743
57523	65535	1667	1743
57523	65535	1665	1743
57523	65535	1666	1743
57522	65535	1667	1743
57523	65535	1666	1743
57523	65535	1666	1744
57523	65535	1667	1742
57523	65535	1667	1743
57523	65535	1667	1742
57524	65535	1665	1744
57522	65535	1666	1743
57523	65535	1667	1743
57524	65535	1666	1744
57523	65535	1667	1744
57523	65535	1666	1742
57522	65535	1667	1744
57523	65535	1667	1744
57522	65535	1667	1743
57524	65535	1666	1744
57523	65535	1666	1744
57523	65535	1666	1742
57523	65535	1667	1745
57522	65535	1667	1744
57523	65535	1667	1743
57524	65535	1666	1742
57523	65535	1667	1742
57524	65535	1667	1744
57523	65535	1666	1745
57523	65535	1666	1744
57523	65535	1667	1744
57523	65535	1666	1744
57523	65535	1665	1742
57522	65535	1665	1743
57522	65535	1666	1744
57524	65535	1666	1743
57523	65535	1665	1744
57523	65535	1666	1743
57523	65535	1667	1744
57523	65535	1665	1744
57524	65535	1667	1742
57523	65535	1667	1743
57523	65535	1667	1745
57523	65535	1668	1744
57522	65535	1665	1741
57523	65535	1667	1742
57524	65535	1666	1743
57523	65535	1666	1742
57523	65535	1667	1743
57523	65535	1667	1743
57523	65535	1666	1744
57523	65535	1666	1744
57524	65535	1666	1741
57523	65535	1667	1743
57523	65535	1667	1743
57523	65535	1668	1744
57522	65535	1666	1744
57523	65535	1668	1742
57523	65535	1668	1743
57524	65535	1667	1744
57524	65535	1666	1744
57522	65535	1666	1745
57523	65535	1666	1744
57522	65535	1666	1743
57523	65535	1667	1743
57523	65535	1667	1743
57523	65535	1666	1743
57523	65535	1667	1744
57523	65535	1667	1744
57524	65535	1668	1744
57523	65535	1667	1743
57524	65535	1666	1744
57523	65535	1667	1743
57523	65535	1667	1743
57523	65535	1666	1744
57524	65535	1666	1743
57524	65535	1667	1744
57523	65535	1668	1742
57523	65535	1666	1745
57522	65535	1667	1744
57524	65535	1667	1743
57523	65535	1666	1743
57524	65535	1668	1744
57523	65535	1667	1745
57523	65535	1667	1743
57523	65535	1666	1744
57523	65535	1666	1743
57523	65535	1668	1742
57523	65535	1667	1744
57523	65535	1667	1743
57523	65535	1667	1744
57524	65535	1668	1744
57523	65535	1667	1744
57523	65535	1667	1742
57524	65535	1665	1745
57523	65535	1665	1745
57523	65535	1667	1743
57523	65535	1665	1743
57523	65535	1666	1744
57523	65535	1668	1744
57524	65535	1666	1744
57523	65535	1665	1744
57524	65535	1667	1744
57523	65535	1666	1744
57523	65535	1667	1744
57524	65535	1667	1742
57523	65535	1666	1745
57524	65535	1668	1743
57523	65535	1666	1742
57523	65535	1665	1744
57524	65535	1667	1744
57523	65535	1665	1744
57523	65535	1667	1743
57523	65535	1666	1744
57523	65535	1667	1742
57523	65535	1667	1744
57522	65535	1667	1742
57523	65535	1666	1744
57524	65535	1666	1744
57523	65535	1667	1743
57524	65535	1666	1744
57523	65535	1666	1744
57523	65535	1668	1744
57523	65535	1666	1743
57523	65535	1668	1742
57524	65535	1666	1744
57523	65535	1667	1743
57523	65535	1667	1744
57522	65535	1666	1743
57524	65535	1667	1744
57523	65535	1666	1743
57523	65535	1665	1744
57523	65535	1666	1744
57523	65535	1666	1744
57524	65535	1665	1744
57523	65535	1667	1744
57523	65535	1666	1743
57524	65535	1665	1743
57523	65535	1668	1743
57523	65535	1668	1744
57524	65535	1667	1743
57524	65535	1667	1744
57523	65535	1665	1745
57524	65535	1667	1744
57523	65535	1667	1744
57523	65535	1668	1742
57523	65535	1668	1744
57523	65535	1667	1742
57523	65535	1668	1744
57523	65535	1667	1743
57522	65535	1666	1744
57523	65535	1668	1744
57523	65535	1668	1742
57523	65535	1665	1744
57523	65535	1667	1744
57523	65535	1667	1745
57523	65535	1666	1744
57523	65535	1666	1743
57524	65535	1666	1744
57523	65535	1669	1745
57523	65535	1666	1743
57523	65535	1665	1744
57523	65535	1667	1743
57523	65535	1666	1744
57524	65535	1667	1744
57523	65535	1665	1743
57523	65535	1668	1743
57524	65535	1667	1741
57523	65535	1665	1744
57524	65535	1667	1744
57523	65535	1665	1743
57524	65535	1667	1745
57523	65535	1667	1744
57524	65535	1666	1744
57523	65535	1666	1743
57523	65535	1667	1744
57524	65535	1666	1743
57523	65535	1665	1744
57523	65535	1668	1742
57523	65535	1665	1743
57524	65535	1666	1744
57523	65535	1667	1742
57523	65535	1666	1743
57523	65535	1666	1742
57524	65535	1666	1744
57523	65535	1666	1743
57524	65535	1666	1743
57523	65535	1667	1743
57523	65535	1668	1743
57524	65535	1666	1745
57525	65535	1666	1743
57523	65535	1667	1744
57523	65535	1667	1744
57523	65535	1667	1743
57524	65535	1665	1743
57523	65535	1668	1744
57523	65535	1666	1743
57523	65535	1666	1744
57523	65535	1666	1743
57523	65535	1666	1744
57523	65535	1667	1743
57523	65535	1667	1743
57523	65535	1667	1744
57523	65535	1666	1744
57523	65535	1665	1743
57523	65535	1666	1744
57523	65535	1667	1743
57523	65535	1666	1743
57523	65535	1666	1743
57523	65535	1666	1744
57523	65535	1666	1743
57523	65535	1668	1743
57523	65535	1666	1743
57523	65535	1666	1744
57524	65535	1666	1744
57524	65535	1666	1744
57523	65535	1666	1743
57524	65535	1667	1743
57524	65535	1666	1743
57523	65535	1667	1744
57523	65535	1666	1743
57523	65535	1666	1745
57523	65535	1666	1744
57523	65535	1668	1744
57523	65535	1667	1742
57523	65535	1666	1743
57523	65535	1667	1742
57523	65535	1666	1744
57524	65535	1666	1742
57523	65535	1666	1742
57523	65535	1668	1743
57523	65535	1667	1745
57523	65535	1666	1743
57524	65535	1666	1743
57524	65535	1668	1743
57523	65535	1666	1743
57524	65535	1668	1743
57523	65535	1666	1744
57523	65535	1666	1743
57523	65535	1667	1742
57523	65535	1667	1743
57522	65535	1666	1743
57523	65535	1667	1744
57523	65535	1667	1744
57524	65535	1667	1744
57523	65535	1667	1742
57524	65535	1665	1743
57523	65535	1668	1744
57524	65535	1666	1744
57523	65535	1667	1743
57523	65535	1667	1744
57524	65535	1664	1743
57524	65535	1666	1744
57523	65535	1665	1743
57523	65535	1665	1743
57524	65535	1668	1743
57523	65535	1666	1743
57522	65535	1666	1743
57523	65535	1665	1743
57524	65535	1665	1743
57524	65535	1668	1743
57523	65535	1667	1744
57523	65535	1667	1745
57523	65535	1666	1744
57524	65535	1667	1743
57523	65535	1667	1744
57523	65535	1666	1743
57524	65535	1667	1741
57524	65535	1666	1744
57523	65535	1666	1743
57523	65535	1667	1743
57523	65535	1666	1744
57523	65535	1666	1742
57523	65535	1667	1744
57523	65535	1666	1744
57523	65535	1666	1743
57523	65535	1669	1743
57523	65535	1666	1743
57523	65535	1667	1743
57523	65535	1666	1744
57523	65535	1667	1742
57523	65535	1668	1743
57523	65535	1666	1744
57523	65535	1665	1743
57523	65535	1668	1745
57523	65535	1667	1742
57523	65535	1668	1743
57524	65535	1667	1743
57524	65535	1666	1746
57523	65535	1665	1743
57524	65535	1666	1743
57524	65535	1666	1743
57524	65535	1666	1743
57523	65535	1667	1744
57524	65535	1666	1742
57523	65535	1666	1743
57523	65535	1664	1744
57523	65535	1667	1743
57524	65535	1666	1744
57523	65535	1667	1743
57523	65535	1666	1744
57523	65535	1668	1742
57523	65535	1667	1744
57523	65535	1666	1743
57523	65535	1667	1744
57523	65535	1667	1744
57524	65535	1668	1742
57523	65535	1666	1744
57524	65535	1665	1743
57523	65535	1668	1743
57523	65535	1667	1744
57523	65535	1666	1744
57523	65535	1668	1743
57524	65535	1668	1744
57522	65535	1665	1743
57523	65535	1666	1744
57523	65535	1665	1743
57524	65535	1668	1744
57523	65535	1667	1742
57523	65535	1667	1744
57523	65535	1666	1744
57523	65535	1667	1743
57524	65535	1668	1744
57523	65535	1667	1743
57523	65535	1666	1744
57523	65535	1666	1743
57523	65535	1666	1744
57524	65535	1667	1744
57523	65535	1666	1743
57524	65535	1666	1742
57523	65535	1667	1744
57524	65535	1666	1744
57523	65535	1668	1743
57522	65535	1666	1743
57524	65535	1665	1744
57524	65535	1667	1744
57523	65535	1667	1744
57523	65535	1666	1742
57523	65535	1667	1744
57523	65535	1666	1742
57523	65535	1667	1744
57523	65535	1667	1744
57523	65535	1666	1745
57524	65535	1667	1743
57523	65535	1668	1743
57523	65535	1667	1744
57524	65535	1667	1743
57523	65535	1667	1744
57523	65535	1666	1742
57524	65535	1667	1742
57523	65535	1667	1744
57523	65535	1665	1743
57523	65535	1668	1741
57523	65535	1666	1744
57523	65535	1666	1743
57523	65535	1666	1743
57523	65535	1667	1744
57523	65535	1667	1744
57523	65535	1667	1743
57523	65535	1666	1742
57523	65535	1667	1744
57523	65535	1666	1743
57524	65535	1665	1745
57523	65535	1666	1745
57522	65535	1667	1744
57523	65535	1665	1744
57523	65535	1666	1744
57524	65535	1664	1743
57524	65535	1666	1743
57523	65535	1667	1743
57523	65535	1666	1744
57523	65535	1666	1743
57523	65535	1666	1743
57524	65535	1666	1742
57524	65535	1667	1744
57523	65535	1666	1744
57523	65535	1667	1743
57523	65535	1666	1743
57524	65535	1667	1744
57524	65535	1667	1742
57524	65535	1667	1744
57523	65535	1667	1745
57523	65535	1667	1743
57524	65535	1668	1743
57523	65535	1666	1744
57523	65535	1667	1744
57523	65535	1666	1743
57524	65535	1666	1743
57523	65535	1666	1744
57522	65535	1668	1744
57523	65535	1667	1745
57523	65535	1667	1743
57523	65535	1667	1744
57523	65535	1666	1743
57524	65535	1667	1742
57523	65535	1667	1745
57523	65535	1666	1744
57523	65535	1666	1744
57523	65535	1665	1743
57524	65535	1666	1742
57524	65535	1666	1745
57524	65535	1667	1743
57523	65535	1666	1744
57523	65535	1667	1744
57523	65535	1667	1743
57523	65535	1667	1743
57523	65535	1667	1744
57523	65535	1667	1742
57523	65535	1668	1744
57523	65535	1668	1741
57523	65535	1667	1745
57523	65535	1666	1743
57524	65535	1666	1744
57523	65535	1667	1744
57523	65535	1667	1745
57523	65535	1666	1744
57523	65535	1666	1744
57523	65535	1666	1743
57523	65535	1667	1744
57523	65535	1667	1744
57524	65535	1667	1744
57523	65535	1666	1744
57523	65535	1666	1743
57523	65535	1668	1744
57523	65535	1667	1742
57523	65535	1666	1746
57524	65535	1666	1745
57523	65535	1666	1743
57524	65535	1666	1744
57523	65535	1667	1743
57523	65535	1668	1743
57523	65535	1666	1745
57523	65535	1666	1743
57524	65535	1664	1744
57523	65535	1666	1742
57523	65535	1666	1745
57523	65535	1666	1743
57523	65535	1666	1743
57523	65535	1665	1743
57523	65535	1667	1742
57523	65535	1668	1743
57524	65535	1667	1744
57523	65535	1667	1744
57524	65535	1667	1744
57523	65535	1666	1743
57523	65535	1667	1743
57523	65535	1667	1743
57523	65535	1665	1744
57523	65535	1666	1745
57523	65535	1667	1742
57524	65535	1666	1744
57522	65535	1667	1743
57523	65535	1666	1743
57523	65535	1667	1744
57523	65535	1668	1744
57523	65535	1667	1744
57523	65535	1667	1742
57523	65535	1666	1744
57521	65535	1666	1744
57523	65535	1666	1744
57523	65535	1667	1744
57523	65535	1667	1744
57522	65535	1667	1744
57523	65535	1666	1742
57524	65535	1666	1744
57523	65535	1668	1745
57523	65535	1667	1743
57523	65535	1667	1744
57523	65535	1665	1744
57523	65535	1665	1744
57524	65535	1668	1744
57522	65535	1666	1742
57523	65535	1666	1744
57524	65535	1665	1743
57524	65535	1666	1743
57523	65535	1667	1744
57523	65535	1666	1744
57523	65535	1668	1743
57524	65535	1667	1742
57524	65535	1666	1743
57523	65535	1666	1743
57524	65535	1667	1744
57524	65535	1666	1741
57523	65535	1668	1742
57523	65535	1666	1744
57523	65535	1667	1744
57522	65535	1668	1743
57523	65535	1665	1744
57524	65535	1667	1744
57523	65535	1666	1744
57522	65535	1666	1744
57524	65535	1666	1743
57524	65535	1666	1742
57523	65535	1667	1744
57523	65535	1666	1742
57523	65535	1666	1742
57523	65535	1667	1742
57523	65535	1666	1743
57523	65535	1666	1744
57523	65535	1666	1743
57523	65535	1668	1743
57523	65535	1667	1745
57523	65535	1666	1742
57523	65535	1666	1742
57523	65535	1667	1745
57523	65535	1667	1744
57523	65535	1669	1742
57524	65535	1668	1742
57523	65535	1667	1744
57524	65535	1666	1743
57525	65535	1667	1745
57522	65535	1667	1742
57523	65535	1666	1744
57523	65535	1667	1744
57522	65535	1668	1744
57523	65535	1668	1744
57524	65535	1667	1743
57523	65535	1666	1743
57523	65535	1665	1743
57523	65535	1667	1743
57524	65535	1668	1744
57524	65535	1666	1743
57523	65535	1667	1744
57523	65535	1666	1743
57523	65535	1666	1741
57523	65535	1665	1742
57523	65535	1666	1744
57524	65535	1665	1743
57523	65535	1666	1744
57523	65535	1666	1743
57524	65535	1667	1742
57522	65535	1666	1745
57523	65535	1666	1743
57523	65535	1667	1743
57524	65535	1667	1745
57523	65535	1667	1743
57523	65535	1668	1743
57523	65535	1668	1742
57523	65535	1666	1743
57523	65535	1667	1744
57523	65535	1668	1743
57523	65535	1666	1744
57523	65535	1667	1743
57523	65535	1666	1743
57523	65535	1666	1743
57524	65535	1666	1743
57523	65535	1666	1744
57522	65535	1668	1744
57523	65535	1666	1743
57522	65535	1667	1744
57524	65535	1666	1743
57523	65535	1666	1745
57524	65535	1667	1743
57523	65535	1667	1741
57521	65535	1667	1742
57523	65535	1667	1744
57523	65535	1668	1743
57524	65535	1668	1744
57523	65535	1668	1744
57523	65535	1667	1742
57521	65535	1667	1744
57523	65535	1667	1744
57523	65535	1666	1742
57523	65535	1666	1744
57523	65535	1666	1744
57524	65535	1666	1744
57523	65535	1666	1742
57523	65535	1668	1744
57522	65535	1667	1742
57522	65535	1666	1742
57522	65535	1666	1743
57524	65535	1666	1743
57524	65535	1667	1743
57523	65535	1666	1743
57523	65535	1665	1744
57523	65535	1667	1745
57524	65535	1665	1742
57522	65535	1665	1744
57523	65535	1666	1744
57523	65535	1666	1742
57523	65535	1668	1743
57524	65535	1667	1744
57522	65535	1666	1743
57523	65535	1666	1743
57523	65535	1667	1743
57523	65535	1666	1742
57523	65535	1666	1744
57524	65535	1666	1742
57523	65535	1667	1744
57524	65535	1666	1743
57523	65535	1668	1742
57523	65535	1667	1743
57523	65535	1666	1743
57523	65535	1665	1745
57524	65535	1665	1744
57523	65535	1666	1743
57523	65535	1664	1743
57523	65535	1666	1745
57523	65535	1666	1744
57524	65535	1666	1744
57524	65535	1667	1743
57523	65535	1666	1743
57523	65535	1667	1745
57523	65535	1667	1744
57523	65535	1667	1743
57523	65535	1667	1742
57523	65535	1665	1743
57523	65535	1666	1743
57523	65535	1667	1744
57523	65535	1667	1743
57523	65535	1666	1743
57523	65535	1666	1743
57523	65535	1667	1744
57523	65535	1668	1742
57524	65535	1667	1743
57524	65535	1666	1744
57522	65535	1667	1744
57523	65535	1666	1744
57524	65535	1665	1745
57523	65535	1666	1744
57523	65535	1666	1745
57523	65535	1668	1744
57523	65535	1666	1744
57524	65535	1666	1744
57523	65535	1666	1741
57523	65535	1666	1743
57523	65535	1667	1742
57523	65535	1668	1744
57523	65535	1667	1743
57523	65535	1666	1744
57523	65535	1667	1743
57523	65535	1666	1742
57523	65535	1666	1743
57523	65535	1667	1742
57523	65535	1667	1743
57523	65535	1666	1742
57523	65535	1668	1743
57524	65535	1666	1744
57523	65535	1667	1742
57524	65535	1665	1745
57523	65535	1666	1742
57523	65535	1666	1744
57523	65535	1666	1745
57523	65535	1668	1745
57523	65535	1666	1745
57523	65535	1666	1744
57523	65535	1667	1743
57523	65535	1666	1742
57523	65535	1666	1744
57523	65535	1667	1743
57523	65535	1665	1744
57523	65535	1665	1743
57524	65535	1667	1743
57523	65535	1667	1744
57523	65535	1667	1743
57523	65535	1666	1744
57523	65535	1666	1744
57523	65535	1666	1744
57523	65535	1665	1744
57522	65535	1666	1742
57523	65535	1669	1743
57523	65535	1667	1743
57523	65535	1666	1742
57522	65535	1666	1743
57523	65535	1667	1743
57524	65535	1668	1744
57523	65535	1667	1743
57523	65535	1667	1743
57523	65535	1667	1743
57523	65535	1666	1744
57523	65535	1667	1743
57524	65535	1667	1744
57523	65535	1666	1742
57523	65535	1666	1744
57523	65535	1666	1744
57524	65535	1667	1742
57523	65535	1667	1744
57523	65535	1666	1743
57523	65535	1667	1744
57523	65535	1667	1744
57523	65535	1667	1745
57524	65535	1668	1743
57524	65535	1666	1742
57523	65535	1667	1744
57523	65535	1667	1743
57524	65535	1666	1744
57523	65535	1667	1744
57523	65535	1665	1744
57523	65535	1667	1744
57523	65535	1667	1744
57524	65535	1667	1743
57524	65535	1667	1744
57523	65535	1667	1745
57523	65535	1668	1742
57524	65535	1666	1744
57524	65535	1668	1742
57523	65535	1667	1743
57523	65535	1666	1743
57524	65535	1666	1745
57524	65535	1666	1743
57522	65535	1666	1745
57522	65535	1667	1743
57523	65535	1666	1743
57523	65535	1666	1744
57523	65535	1668	1743
57524	65535	1667	1746
57523	65535	1666	1744
57524	65535	1667	1744
57523	65535	1667	1744
57523	65535	1664	1744
57524	65535	1666	1742
57523	65535	1665	1745
57523	65535	1667	1743
57524	65535	1667	1743
57524	65535	1667	1745
57524	65535	1666	1744
57523	65535	1666	1744
57524	65535	1666	1744
57523	65535	1667	1743
57523	65535	1667	1744
57524	65535	1667	1743
57524	65535	1667	1745
57523	65535	1667	1744
57523	65535	1666	1743
57523	65535	1667	1743
57524	65535	1666	1745
57523	65535	1667	1743
57523	65535	1666	1743
57522	65535	1665	1744
57523	65535	1667	1742
57523	65535	1668	1746
57523	65535	1667	1743
57523	65535	1665	1744
57524	65535	1665	1744
57523	65535	1667	1743
57523	65535	1667	1743
57523	65535	1667	1744
57523	65535	1666	1743
57523	65535	1666	1742
57523	65535	1666	1744
57524	65535	1668	1742
57523	65535	1668	1744
57523	65535	1668	1743
57523	65535	1667	1743
57523	65535	1666	1743
57523	65535	1668	1744
57523	65535	1666	1745
57524	65535	1667	1742
57524	65535	1667	1744
57523	65535	1667	1743
57523	65535	1665	1744
57523	65535	1665	1742
57523	65535	1666	1743
57523	65535	1666	1743
57524	65535	1667	1744
57524	65535	1667	1744
57523	65535	1667	1745
57524	65535	1666	1742
57523	65535	1665	1744
57523	65535	1668	1743
57523	65535	1666	1742
57523	65535	1667	1744
57523	65535	1665	1743
57523	65535	1667	1744
57524	65535	1667	1743
57523	65535	1666	1742
57523	65535	1667	1744
57523	65535	1667	1744
57523	65535	1667	1743
57523	65535	1665	1745
57524	65535	1666	1744
57522	65535	1666	1744
57523	65535	1668	1743
57523	65535	1667	1743
57522	65535	1667	1742
57523	65535	1665	1744
57523	65535	1667	1742
57524	65535	1668	1744
57523	65535	1668	1744
57523	65535	1667	1743
57523	65535	1668	1744
57523	65535	1668	1743
57523	65535	1664	1744
57524	65535	1668	1743
57523	65535	1668	1743
57523	65535	1667	1743
57523	65535	1666	1742
57523	65535	1665	1742
57524	65535	1666	1743
57523	65535	1666	1744
57523	65535	1666	1743
57523	65535	1667	1743
57523	65535	1668	1742
57523	65535	1667	1744
57522	65535	1666	1743
57523	65535	1668	1745
57523	65535	1666	1742
57524	65535	1666	1743
57524	65535	1666	1743
57523	65535	1665	1744
57523	65535	1666	1744
57524	65535	1667	1742
57524	65535	1668	1742
57523	65535	1666	1744
57523	65535	1666	1745
57523	65535	1666	1744
57523	65535	1666	1743
57524	65535	1667	1744
57524	65535	1667	1743
57523	65535	1667	1744
57523	65535	1668	1742
57523	65535	1667	1744
57523	65535	1668	1744
57523	65535	1665	1744
57522	65535	1667	1742
57523	65535	1666	1744
57523	65535	1667	1743
57523	65535	1667	1744
57523	65535	1667	1742
57523	65535	1666	1744
57523	65535	1667	1743
57523	65535	1666	1743
57523	65535	1667	1743
57524	65535	1667	1743
57523	65535	1666	1741
57524	65535	1666	1743
57524	65535	1666	1744
57523	65535	1667	1744
57523	65535	1666	1743
57523	65535	1666	1742
57523	65535	1665	1744
57523	65535	1667	1743
57523	65535	1667	1743
57523	65535	1667	1743
57523	65535	1667	1744
57523	65535	1666	1744
57523	65535	1668	1744
57524	65535	1666	1742
57523	65535	1668	1744
57523	65535	1668	1742
57523	65535	1667	1744
57523	65535	1667	1743
57524	65535	1667	1742
57523	65535	1669	1744
57523	65535	1666	1743
57523	65535	1667	1744
57523	65535	1666	1744
57523	65535	1666	1743
57523	65535	1666	1744
57523	65535	1667	1744
57523	65535	1666	1746
57524	65535	1666	1744
57523	65535	1666	1743
57524	65535	1667	1745
57523	65535	1667	1742
57523	65535	1667	1744
57523	65535	1665	1743
57523	65535	1667	1744
57523	65535	1667	1744
57523	65535	1665	1744
57523	65535	1666	1744
57523	65535	1668	1744
57523	65535	1666	1743
57523	65535	1667	1744
57523	65535	1667	1741
57524	65535	1666	1743
57522	65535	1667	1743
57524	65535	1666	1744
57523	65535	1669	1745
57523	65535	1666	1743
57523	65535	1666	1742
57524	65535	1665	1742
57523	65535	1667	1745
57523	65535	1667	1743
57524	65535	1666	1743
57523	65535	1668	1742
57523	65535	1667	1744
57523	65535	1665	1744
57524	65535	1667	1744
57524	65535	1668	1744
57523	65535	1667	1744
57523	65535	1667	1742
57523	65535	1665	1743
57523	65535	1666	1742
57523	65535	1666	1741
57523	65535	1665	1742
57523	65535	1669	1743
57522	65535	1666	1744
57523	65535	1667	1742
57524	65535	1665	1744
57524	65535	1666	1742
57524	65535	1667	1744
57524	65535	1666	1744
57523	65535	1667	1743
57523	65535	1665	1743
57523	65535	1667	1742
57524	65535	1667	1743
57523	65535	1666	1743
57524	65535	1666	1743
57523	65535	1667	1744
57523	65535	1668	1743
57524	65535	1666	1744
57523	65535	1666	1743
57523	65535	1667	1743
57523	65535	1666	1743
57523	65535	1666	1743
57524	65535	1666	1742
57523	65535	1667	1744
57523	65535	1666	1744
57523	65535	1667	1744
57523	65535	1664	1743
57523	65535	1667	1743
57523	65535	1667	1742
57523	65535	1666	1744
57523	65535	1667	1743
57523	65535	1667	1743
57523	65535	1669	1743
57523	65535	1666	1744
57523	65535	1667	1742
57523	65535	1666	1745
57523	65535	1668	1743
57523	65535	1666	1744
57523	65535	1666	1744
57522	65535	1666	1742
57523	65535	1664	1742
57523	65535	1667	1744
57523	65535	1666	1744
57523	65535	1667	1744
57523	65535	1665	1744
57523	65535	1667	1744
57523	65535	1666	1743
57523	65535	1665	1744
57523	65535	1666	1743
57523	65535	1667	1743
57523	65535	1667	1745
57523	65535	1668	1743
57523	65535	1667	1744
57523	65535	1666	1743
57524	65535	1666	1744
57523	65535	1666	1743
57523	65535	1665	1741
57523	65535	1666	1744
57523	65535	1667	1744
57522	65535	1668	1744
57523	65535	1665	1744
57524	65535	1666	1743
57523	65535	1667	1744
57523	65535	1667	1743
57523	65535	1665	1744
57523	65535	1666	1743
57523	65535	1667	1744
57523	65535	1666	1744
57523	65535	1667	1742
57523	65535	1666	1743
57524	65535	1667	1744
57522	65535	1666	1743
57523	65535	1668	1743
57523	65535	1668	1742
57522	65535	1667	1743
57523	65535	1666	1744
57523	65535	1667	1743
57524	65535	1666	1742
57524	65535	1667	1743
57523	65535	1666	1743
57524	65535	1665	1743
57523	65535	1666	1744
57524	65535	1667	1745
57523	65535	1666	1744
57523	65535	1667	1743
57524	65535	1666	1743
57523	65535	1666	1744
57523	65535	1668	1744
57523	65535	1667	1744
57523	65535	1667	1743
57523	65535	1666	1743
57523	65535	1667	1744
57524	65535	1667	1744
57523	65535	1667	1742
57524	65535	1667	1744
57522	65535	1666	1743
57523	65535	1667	1743
57523	65535	1667	1745
57524	65535	1666	1742
57523	65535	1666	1744
57523	65535	1667	1743
57523	65535	1666	1744
57522	65535	1667	1744
57524	65535	1666	1743
57523	65535	1665	1742
57523	65535	1668	1742
57522	65535	1666	1742
57523	65535	1666	1744
57523	65535	1667	1743
57523	65535	1665	1743
57523	65535	1666	1743
57523	65535	1666	1744
57524	65535	1666	1745
57523	65535	1666	1743
57523	65535	1666	1744
57523	65535	1665	1743
57524	65535	1666	1744
57523	65535	1666	1741
57523	65535	1667	1743
57524	65535	1666	1744
57523	65535	1668	1743
57523	65535	1667	1742
57524	65535	1666	1743
57523	65535	1667	1745
57524	65535	1666	1742
57522	65535	1665	1745
57524	65535	1668	1743
57522	65535	1666	1744
57524	65535	1667	1742
57523	65535	1666	1743
57523	65535	1665	1744
57524	65535	1666	1743
57523	65535	1666	1743
57523	65535	1667	1743
57524	65535	1666	1742
57523	65535	1666	1744
57524	65535	1668	1743
57523	65535	1666	1742
57524	65535	1666	1744
57523	65535	1666	1742
57523	65535	1667	1743
57523	65535	1667	1744
57523	65535	1667	1744
57523	65535	1666	1742
57523	65535	1666	1745
57523	65535	1667	1742
57523	65535	1666	1744
[truncated: 223,000 more rows]
